# Supplementary material
Source: ML conference proceedings conference paper supplement (https://www.ecva.net/papers/eccv_2020/papers_ECCV/html/123580766_ECCV_2020_paper.php)

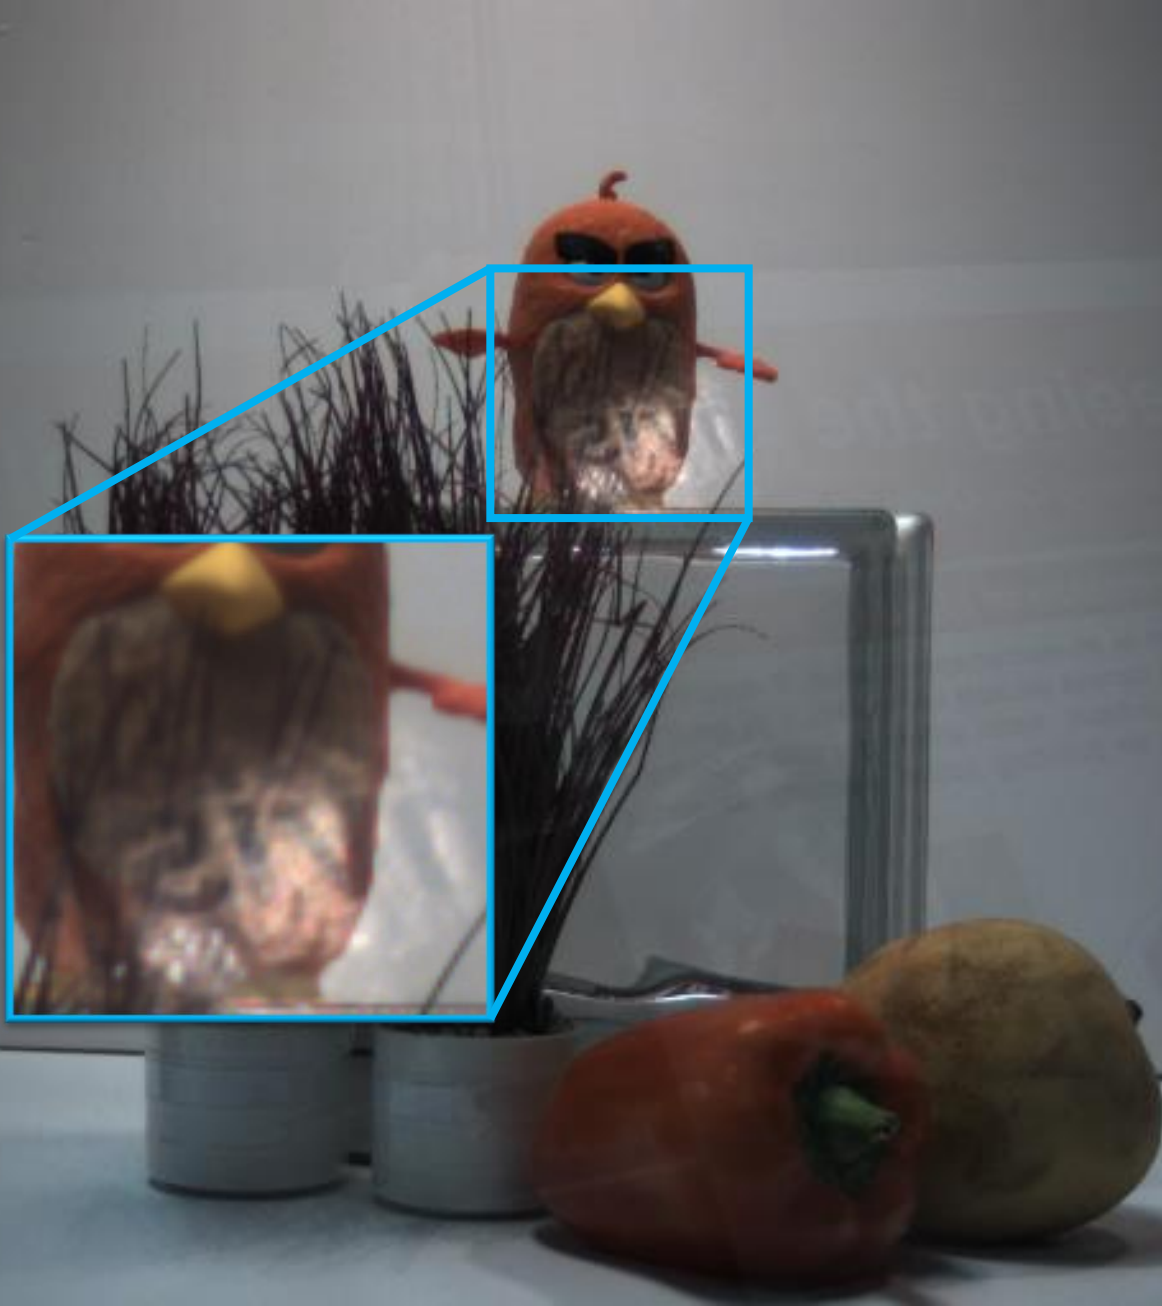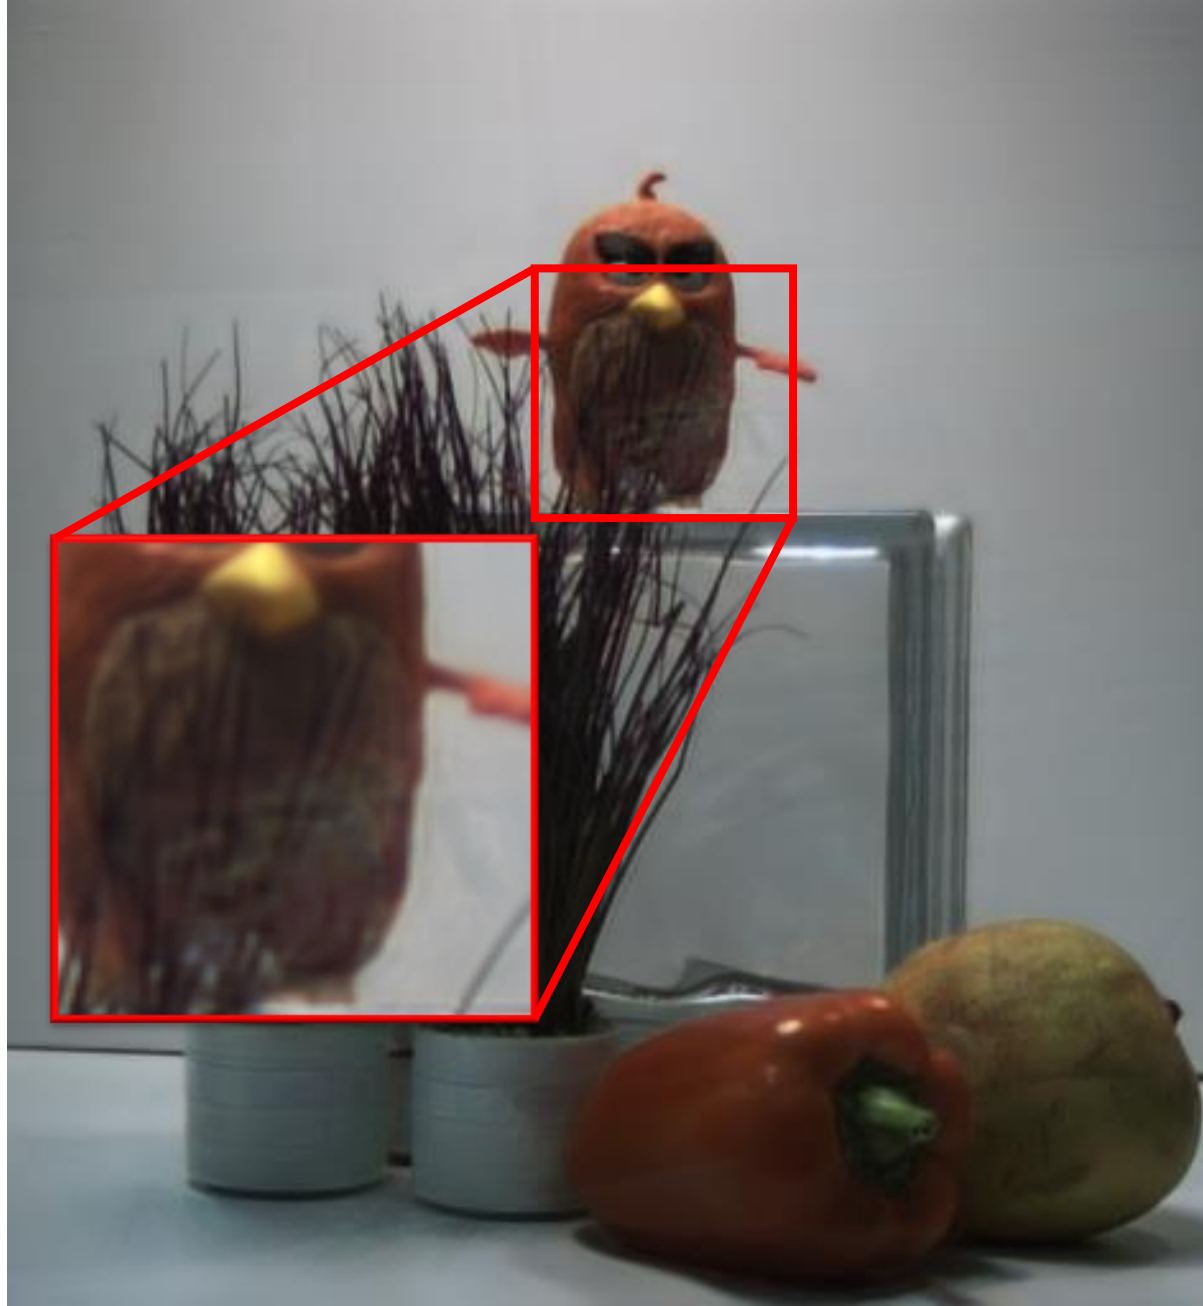

Supplement: Supplementary file 1 [file 123580766-supp.zip]

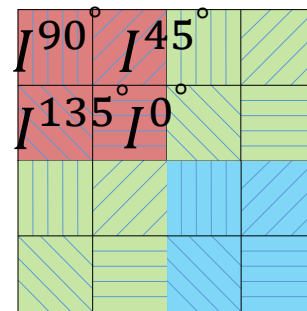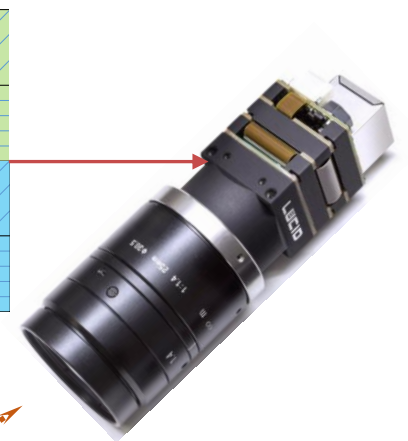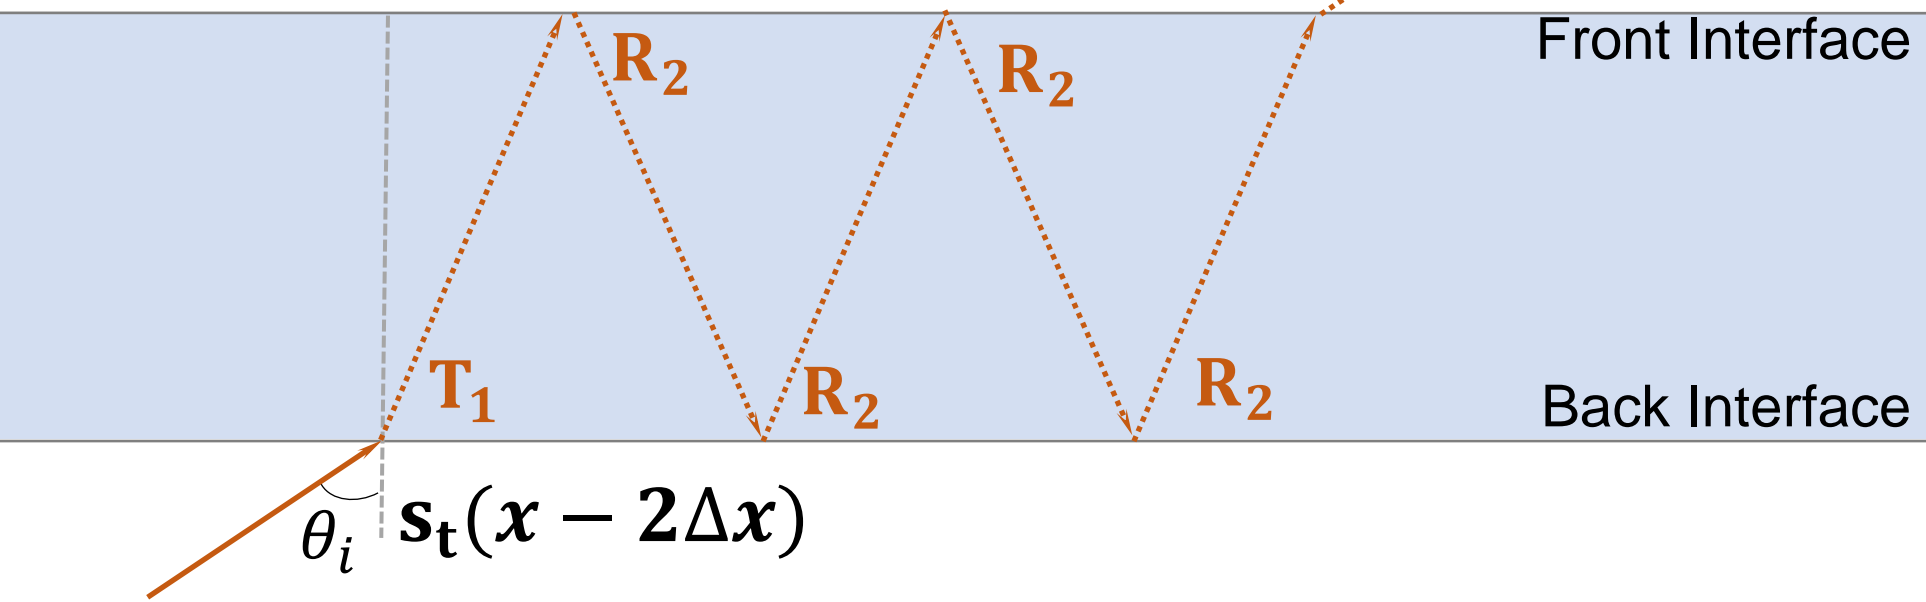

Supplement: Supplementary file 2 [file 123580766-supp.zip]

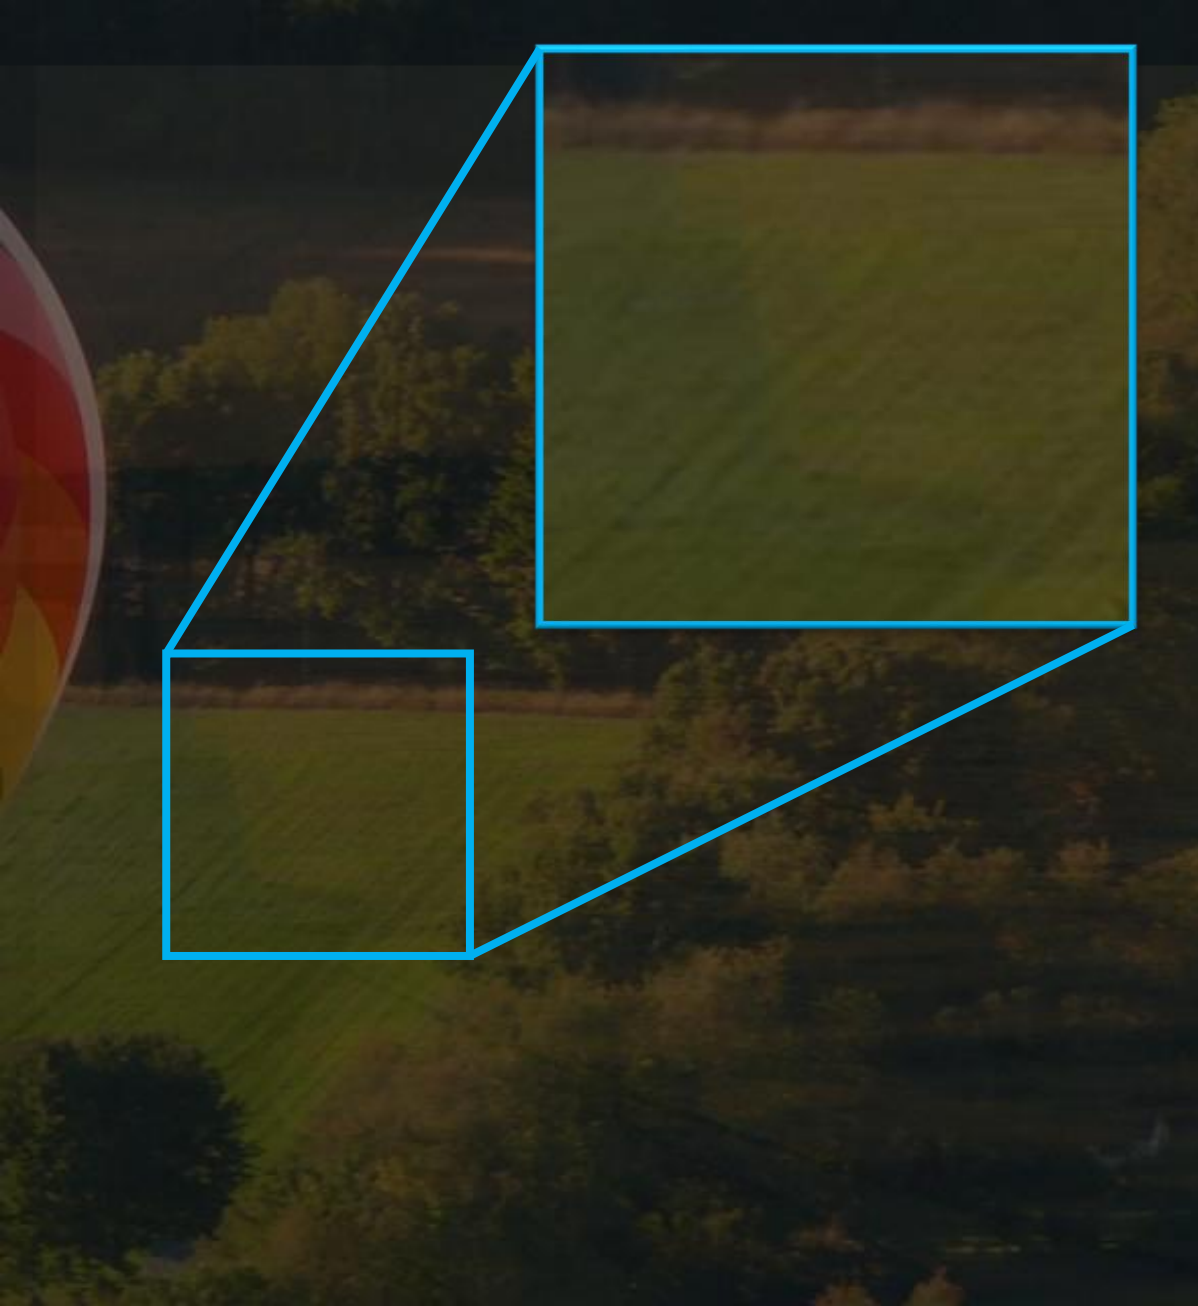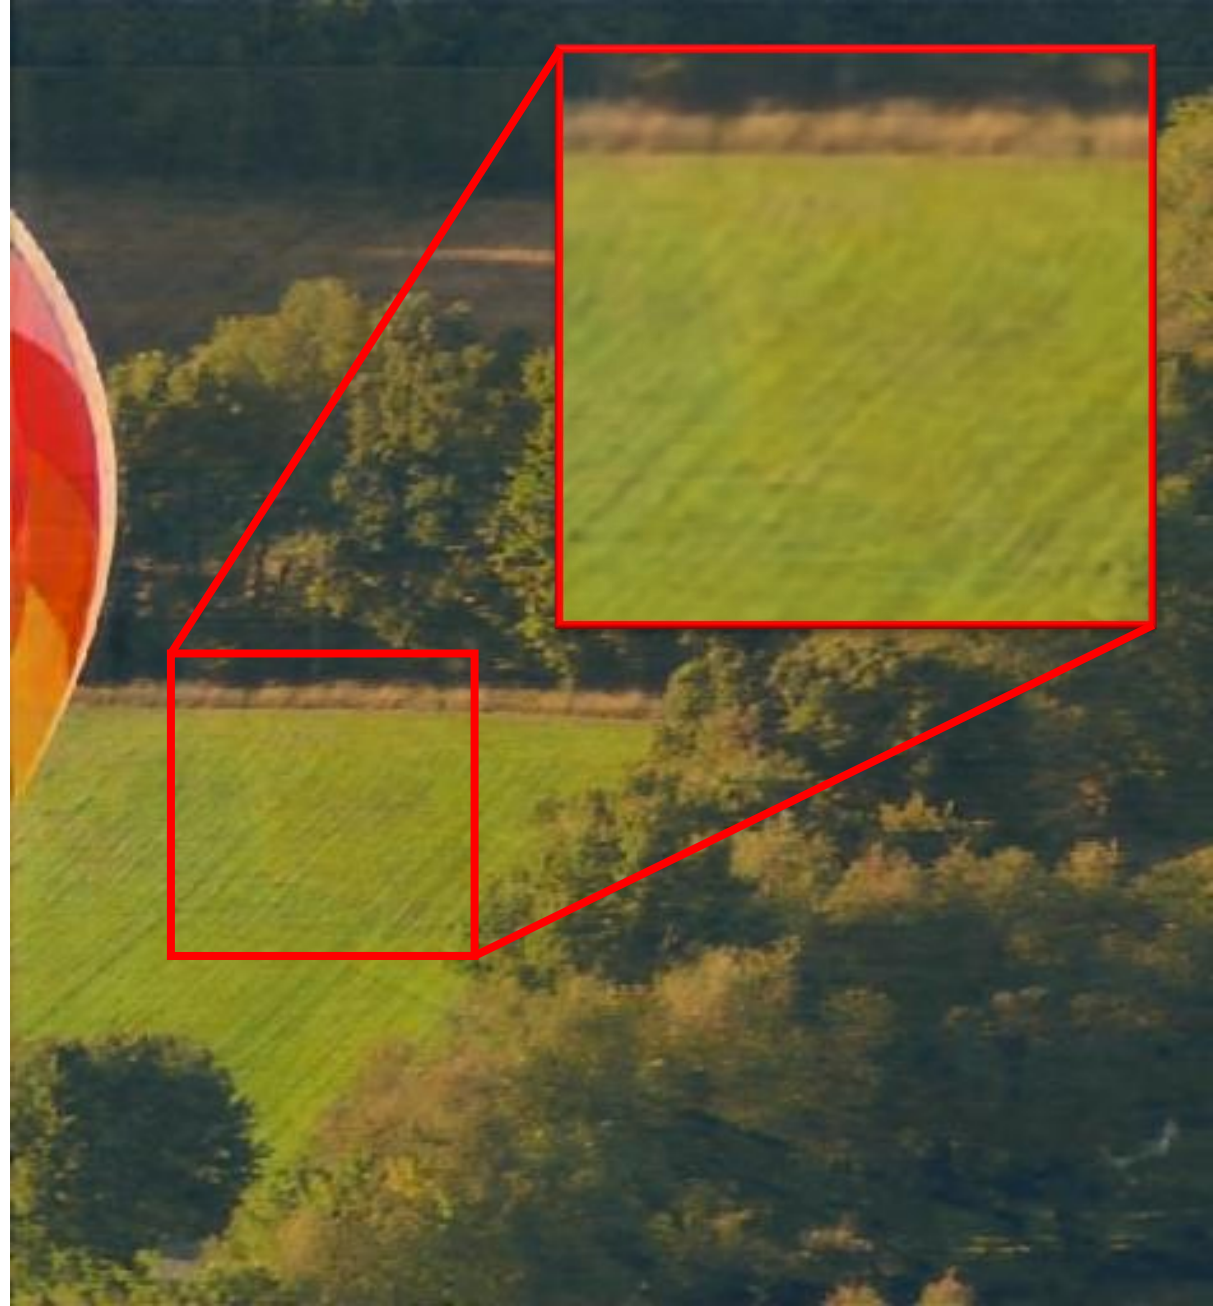

Supplement: Supplementary file 3 [file 123580766-supp.zip]

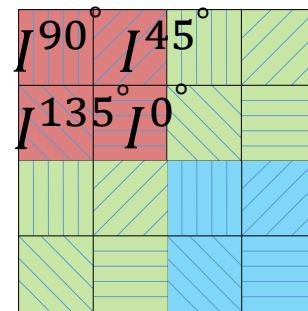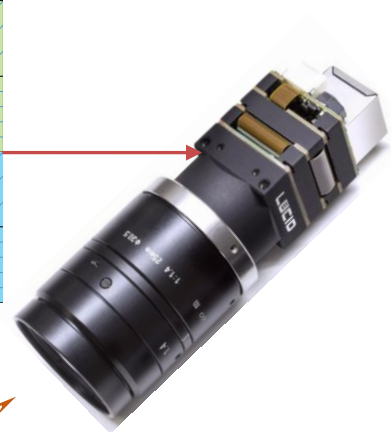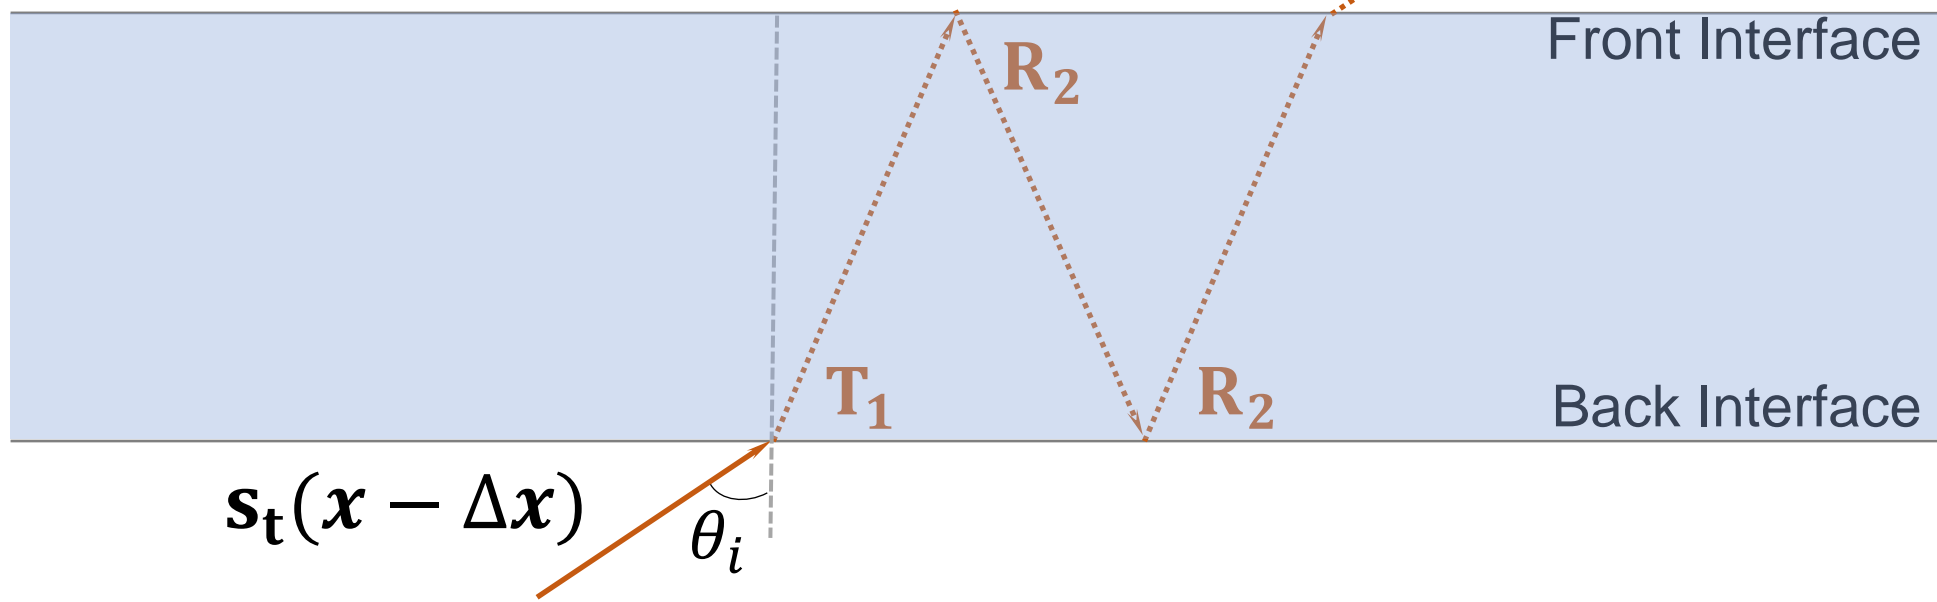

Supplement: Supplementary file 5 [file 123580766-supp.zip]

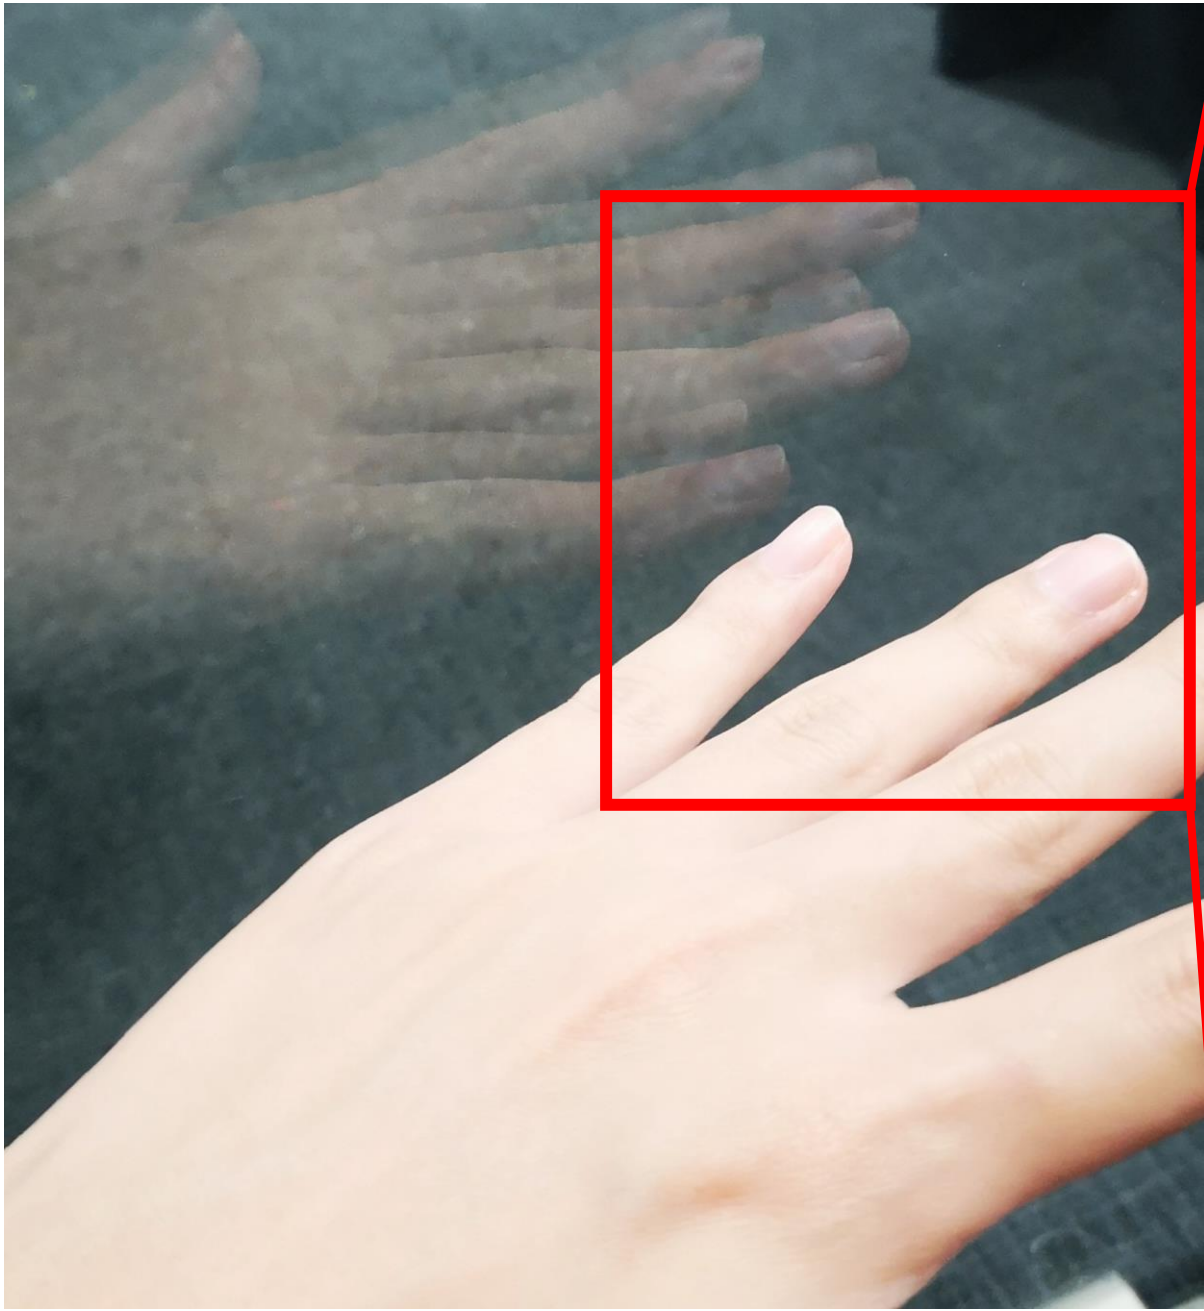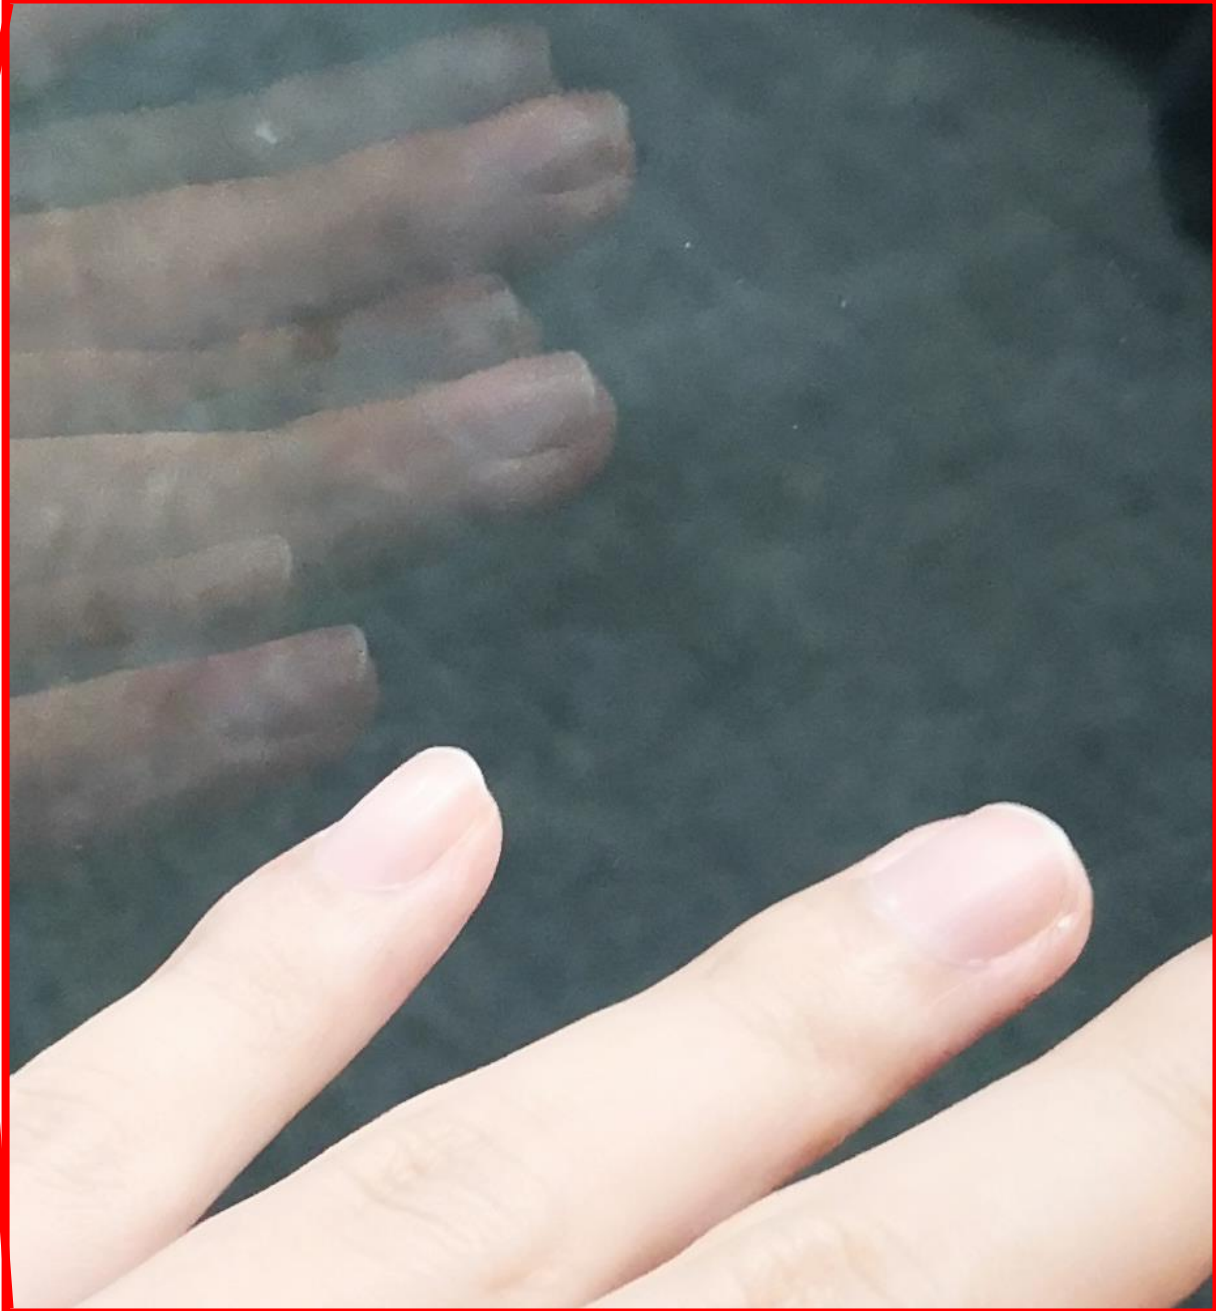

Supplement: Supplementary file 6 [file 123580766-supp.zip]

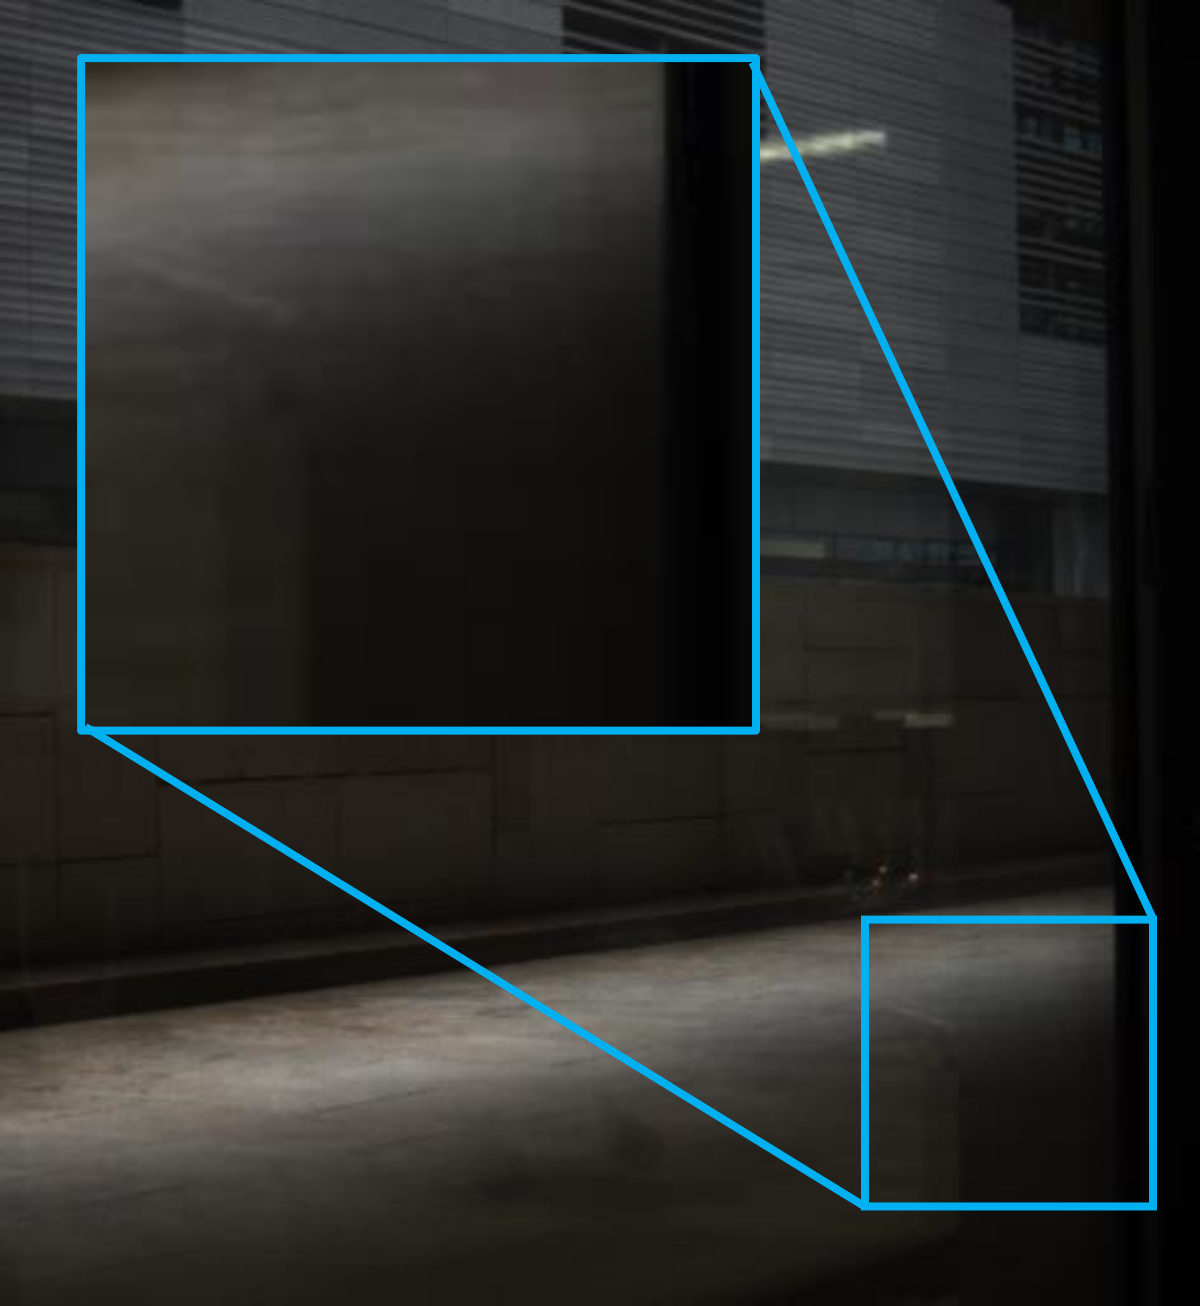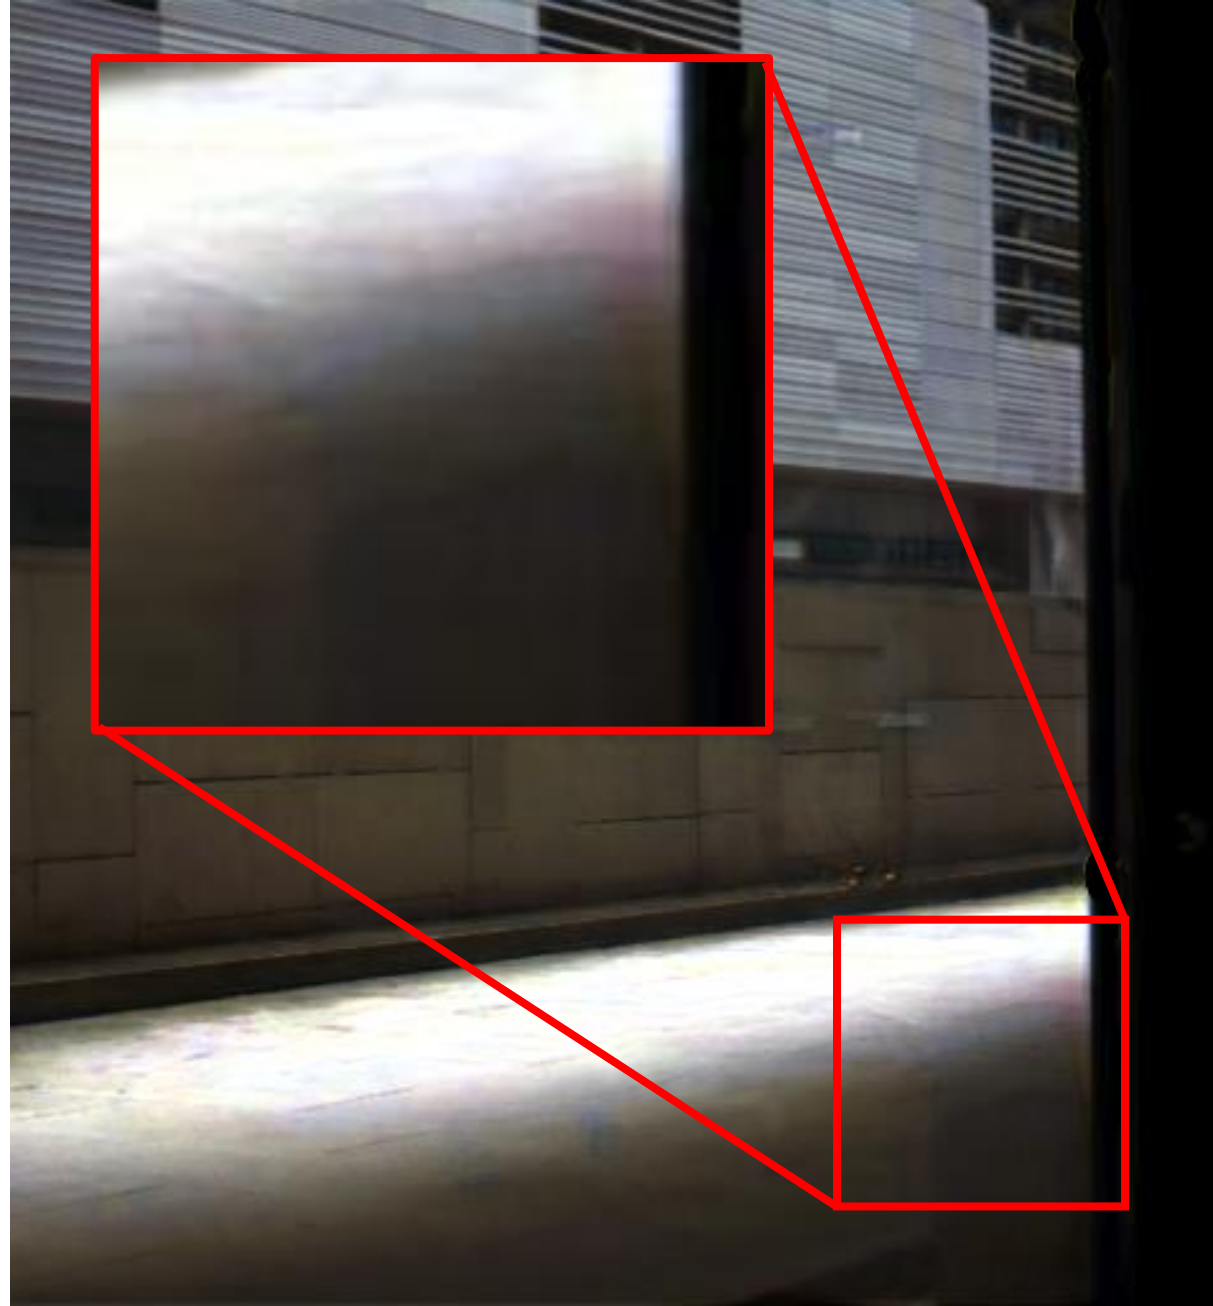

Supplement: Supplementary file 7 [file 123580766-supp.zip]

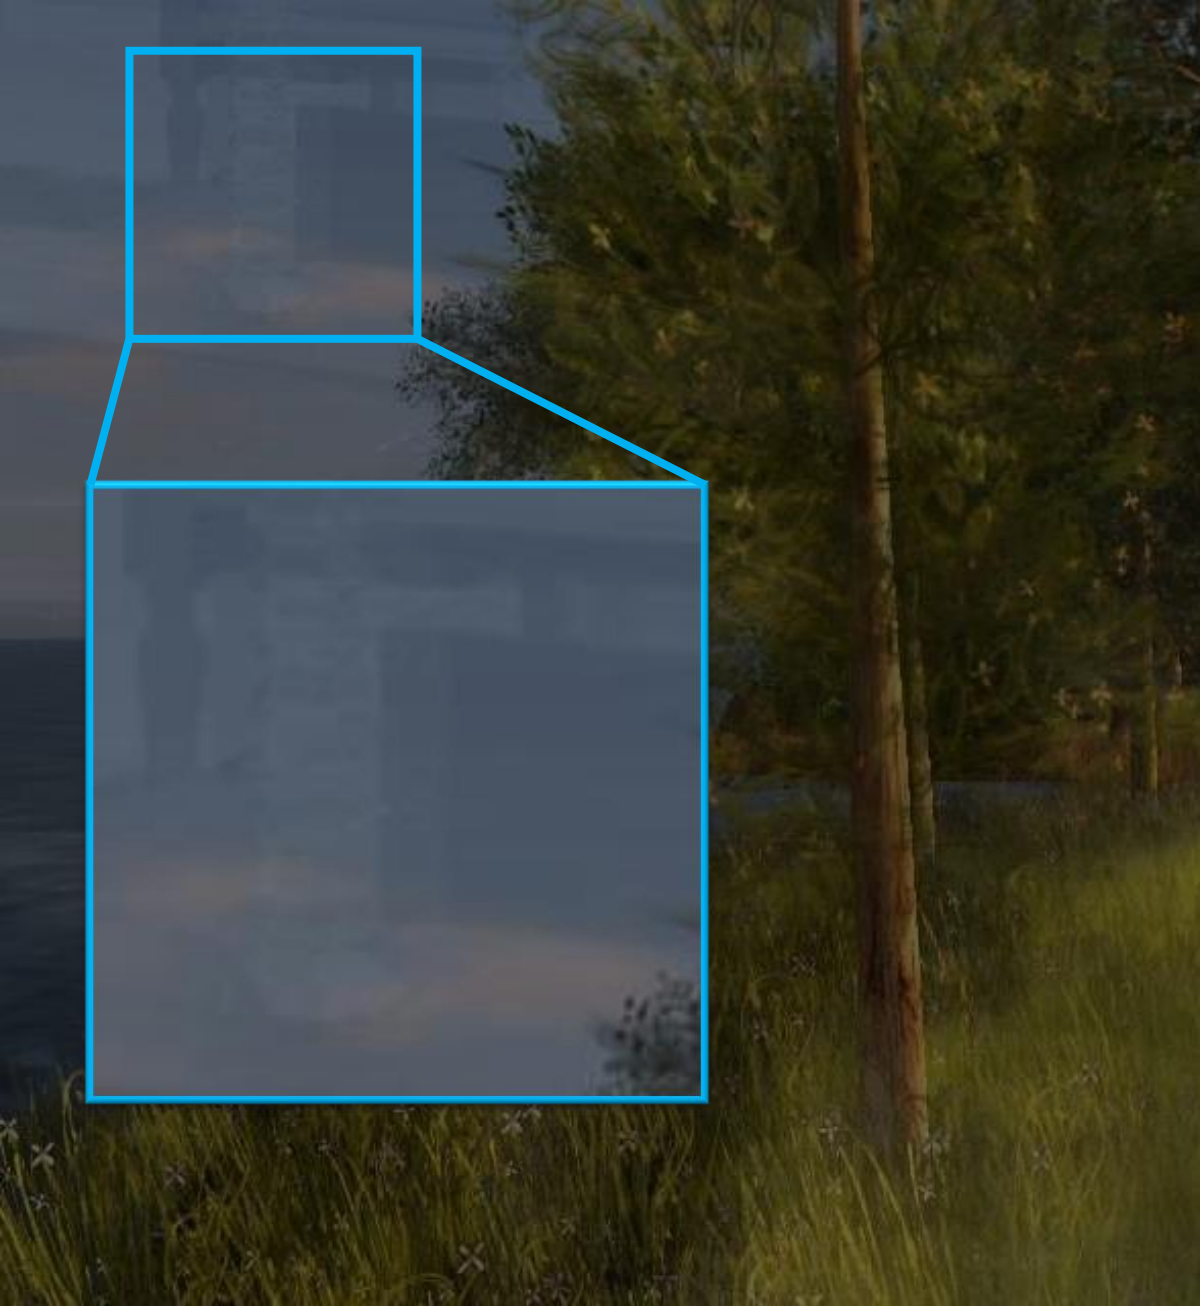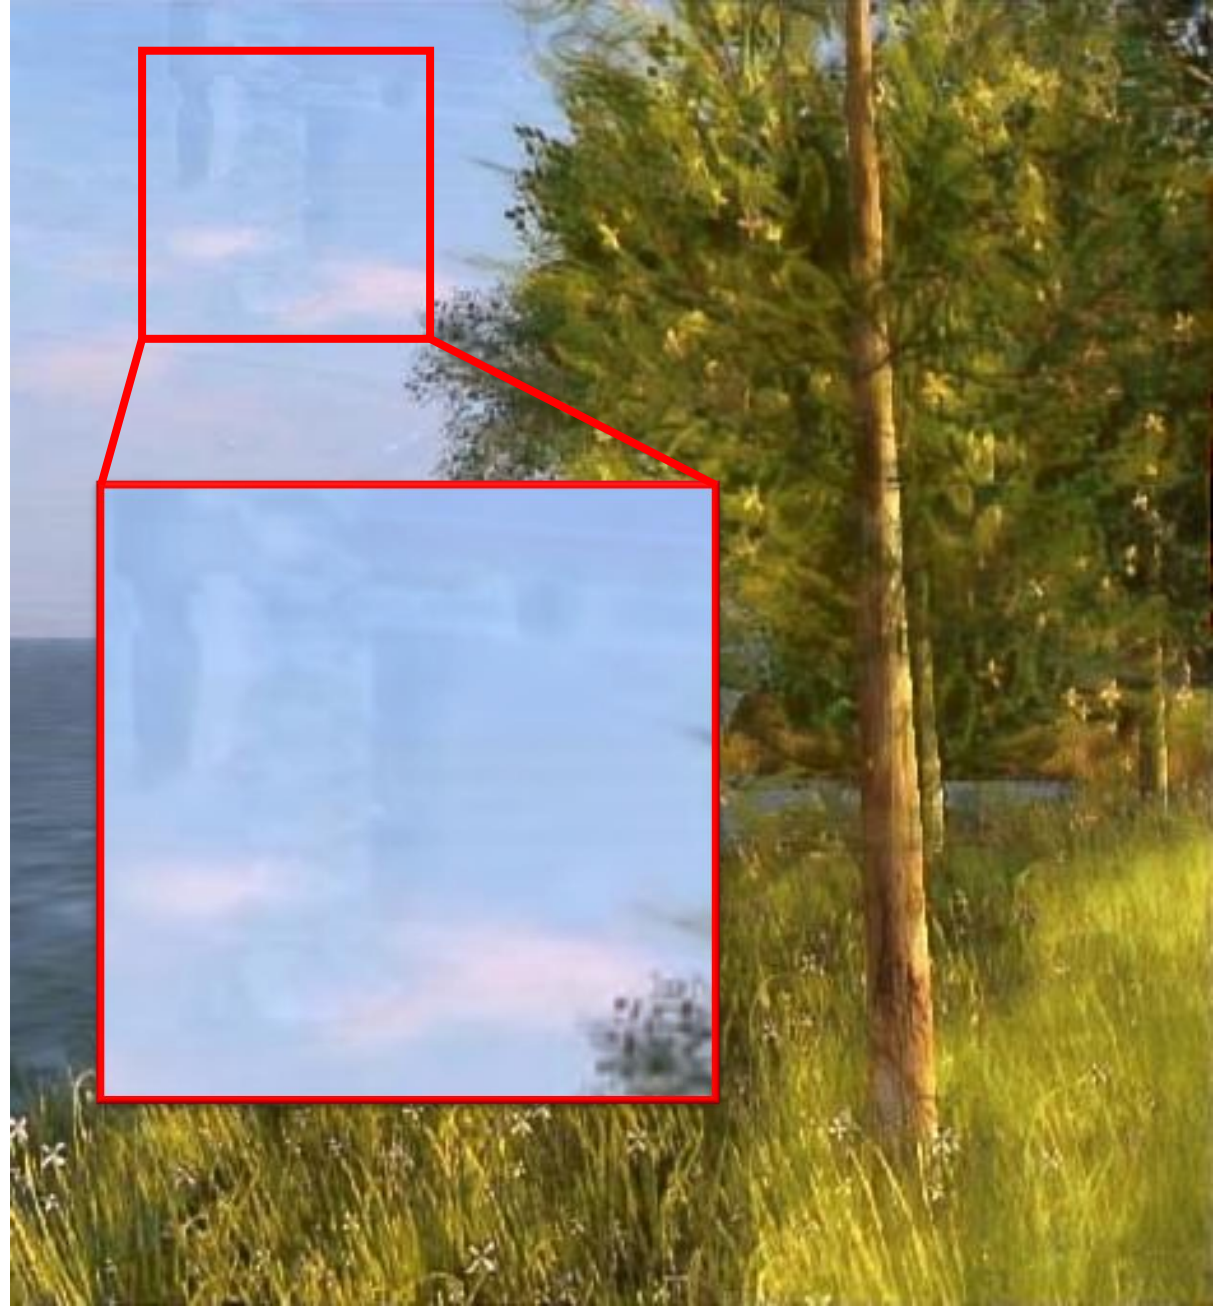

Supplement: Supplementary file 8 [file 123580766-supp.zip]

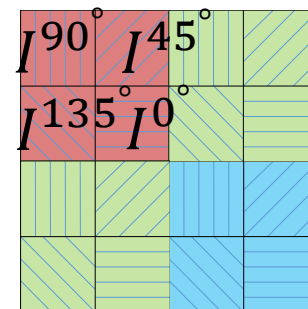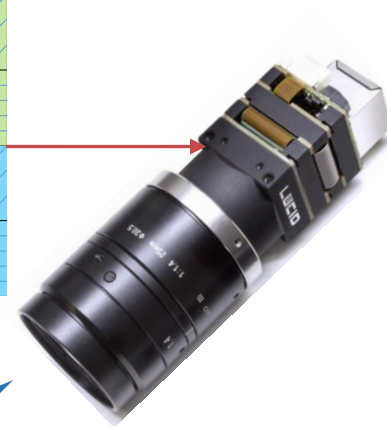

$\mathbf{s}_r(x - 2\Delta x)$

Incident light

$\theta_i$

$T_1$

$R_2$

$T_2$

Front Interface

$R_2$

$R_2$

Back Interface

Supplement: Supplementary file 9 [file 123580766-supp.zip]

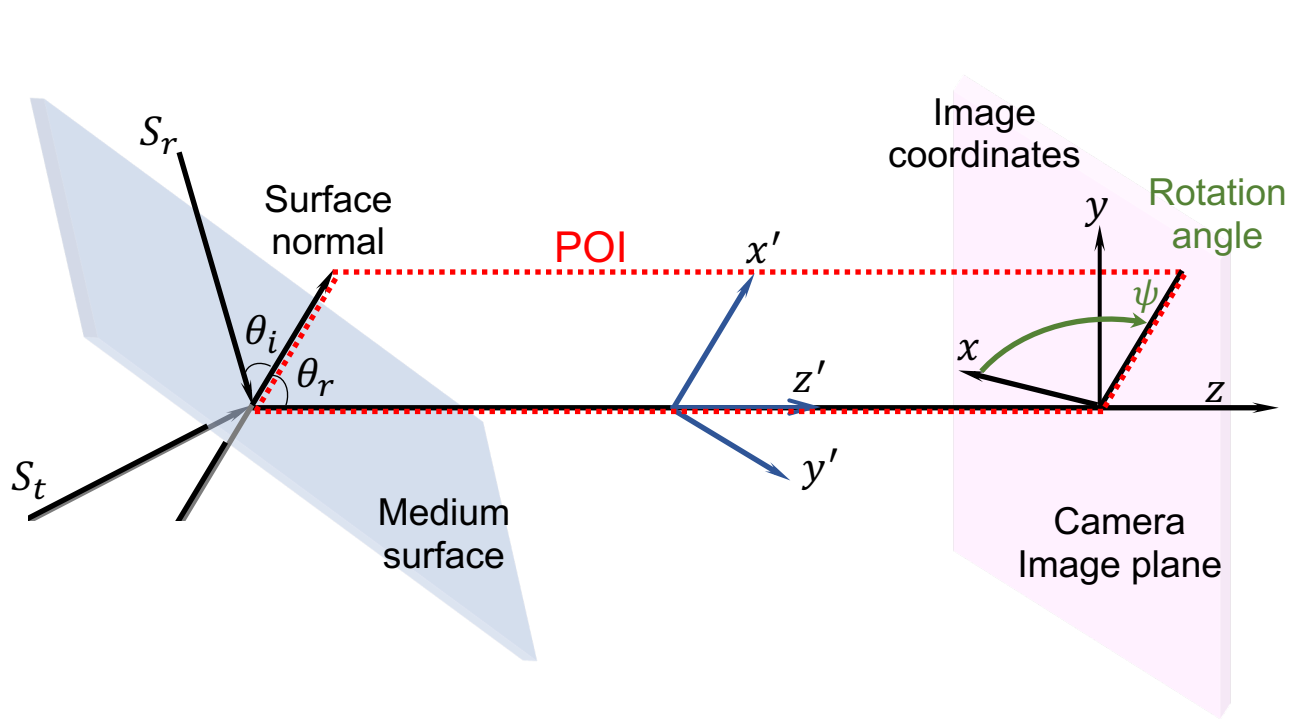

(a)

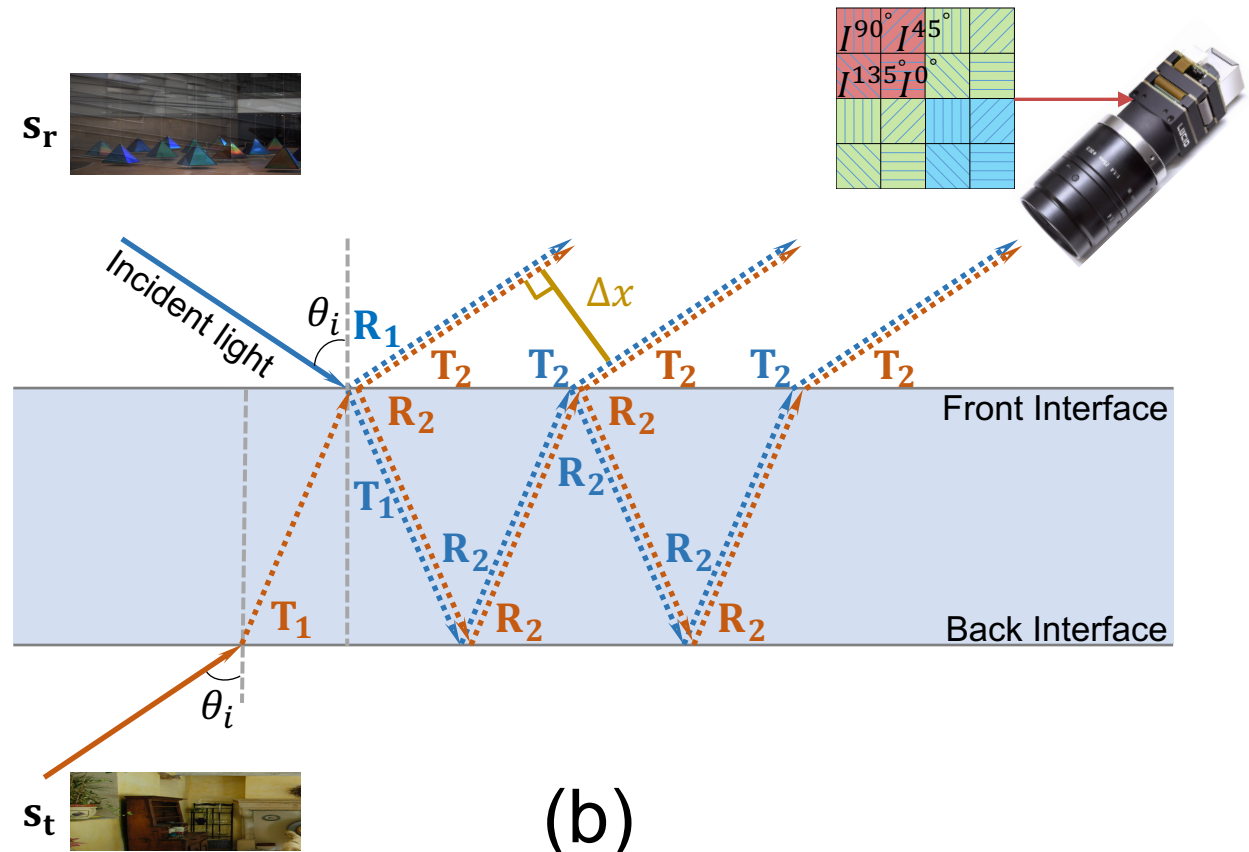

(b)

Supplement: Supplementary file 10 [file 123580766-supp.zip]

$$\mathbf{s}_r(\mathbf{x} - \Delta \mathbf{x})$$

Incident light

$\theta_i$

$T_1$

$T_2$

$R_2$

Front Interface

Back Interface

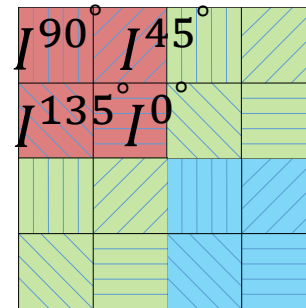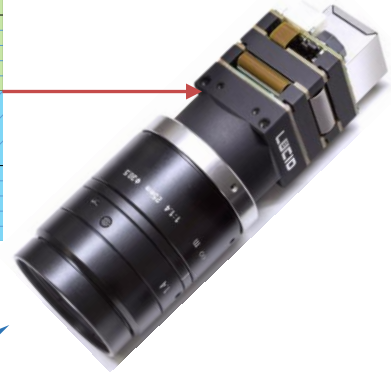

Supplement: Supplementary file 11 [file 123580766-supp.zip]

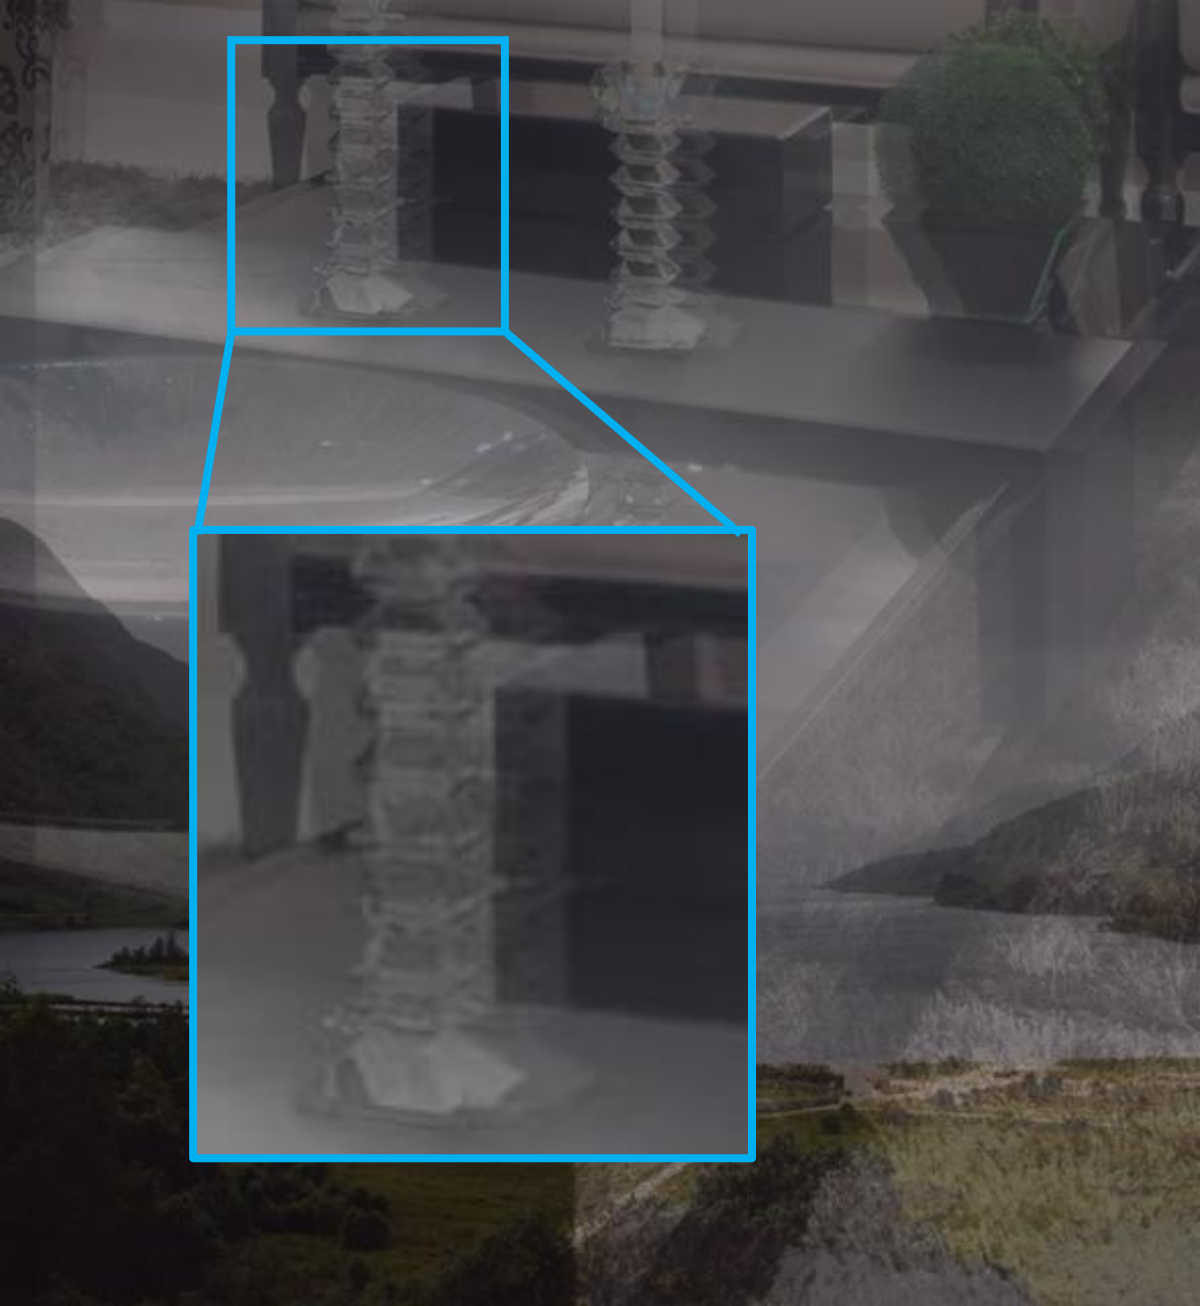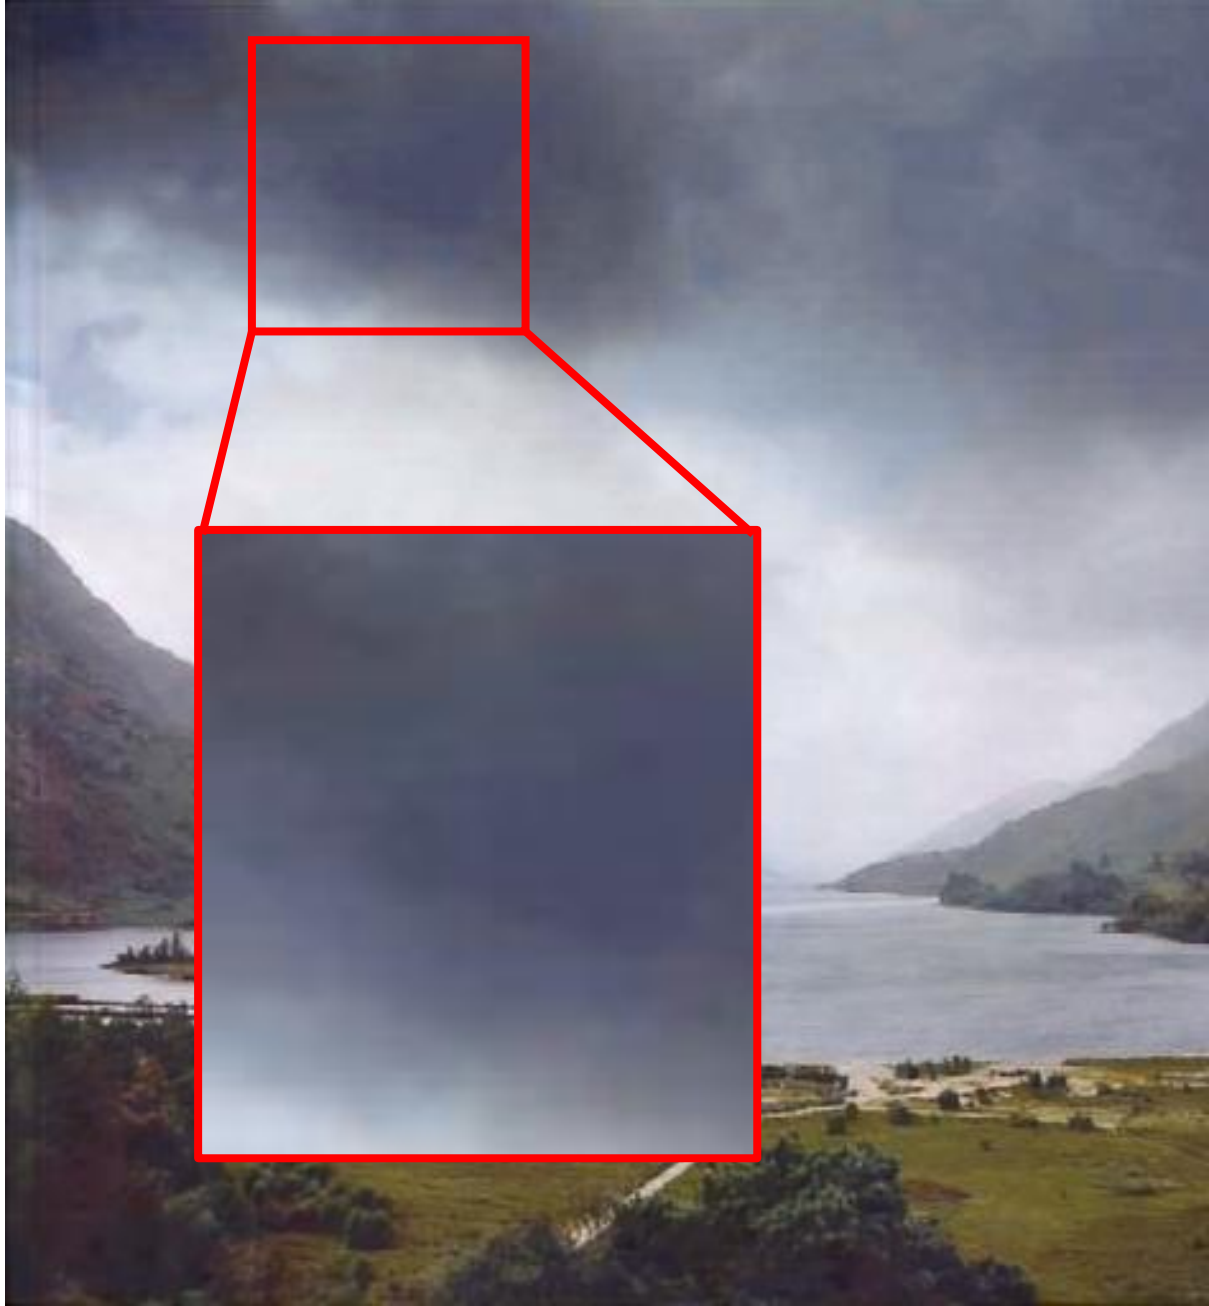

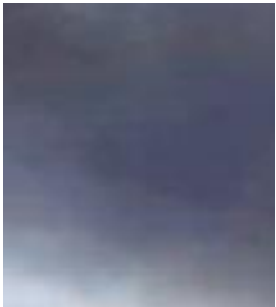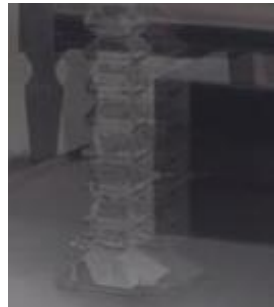

Supplement: Supplementary file 12 [file 123580766-supp.zip]

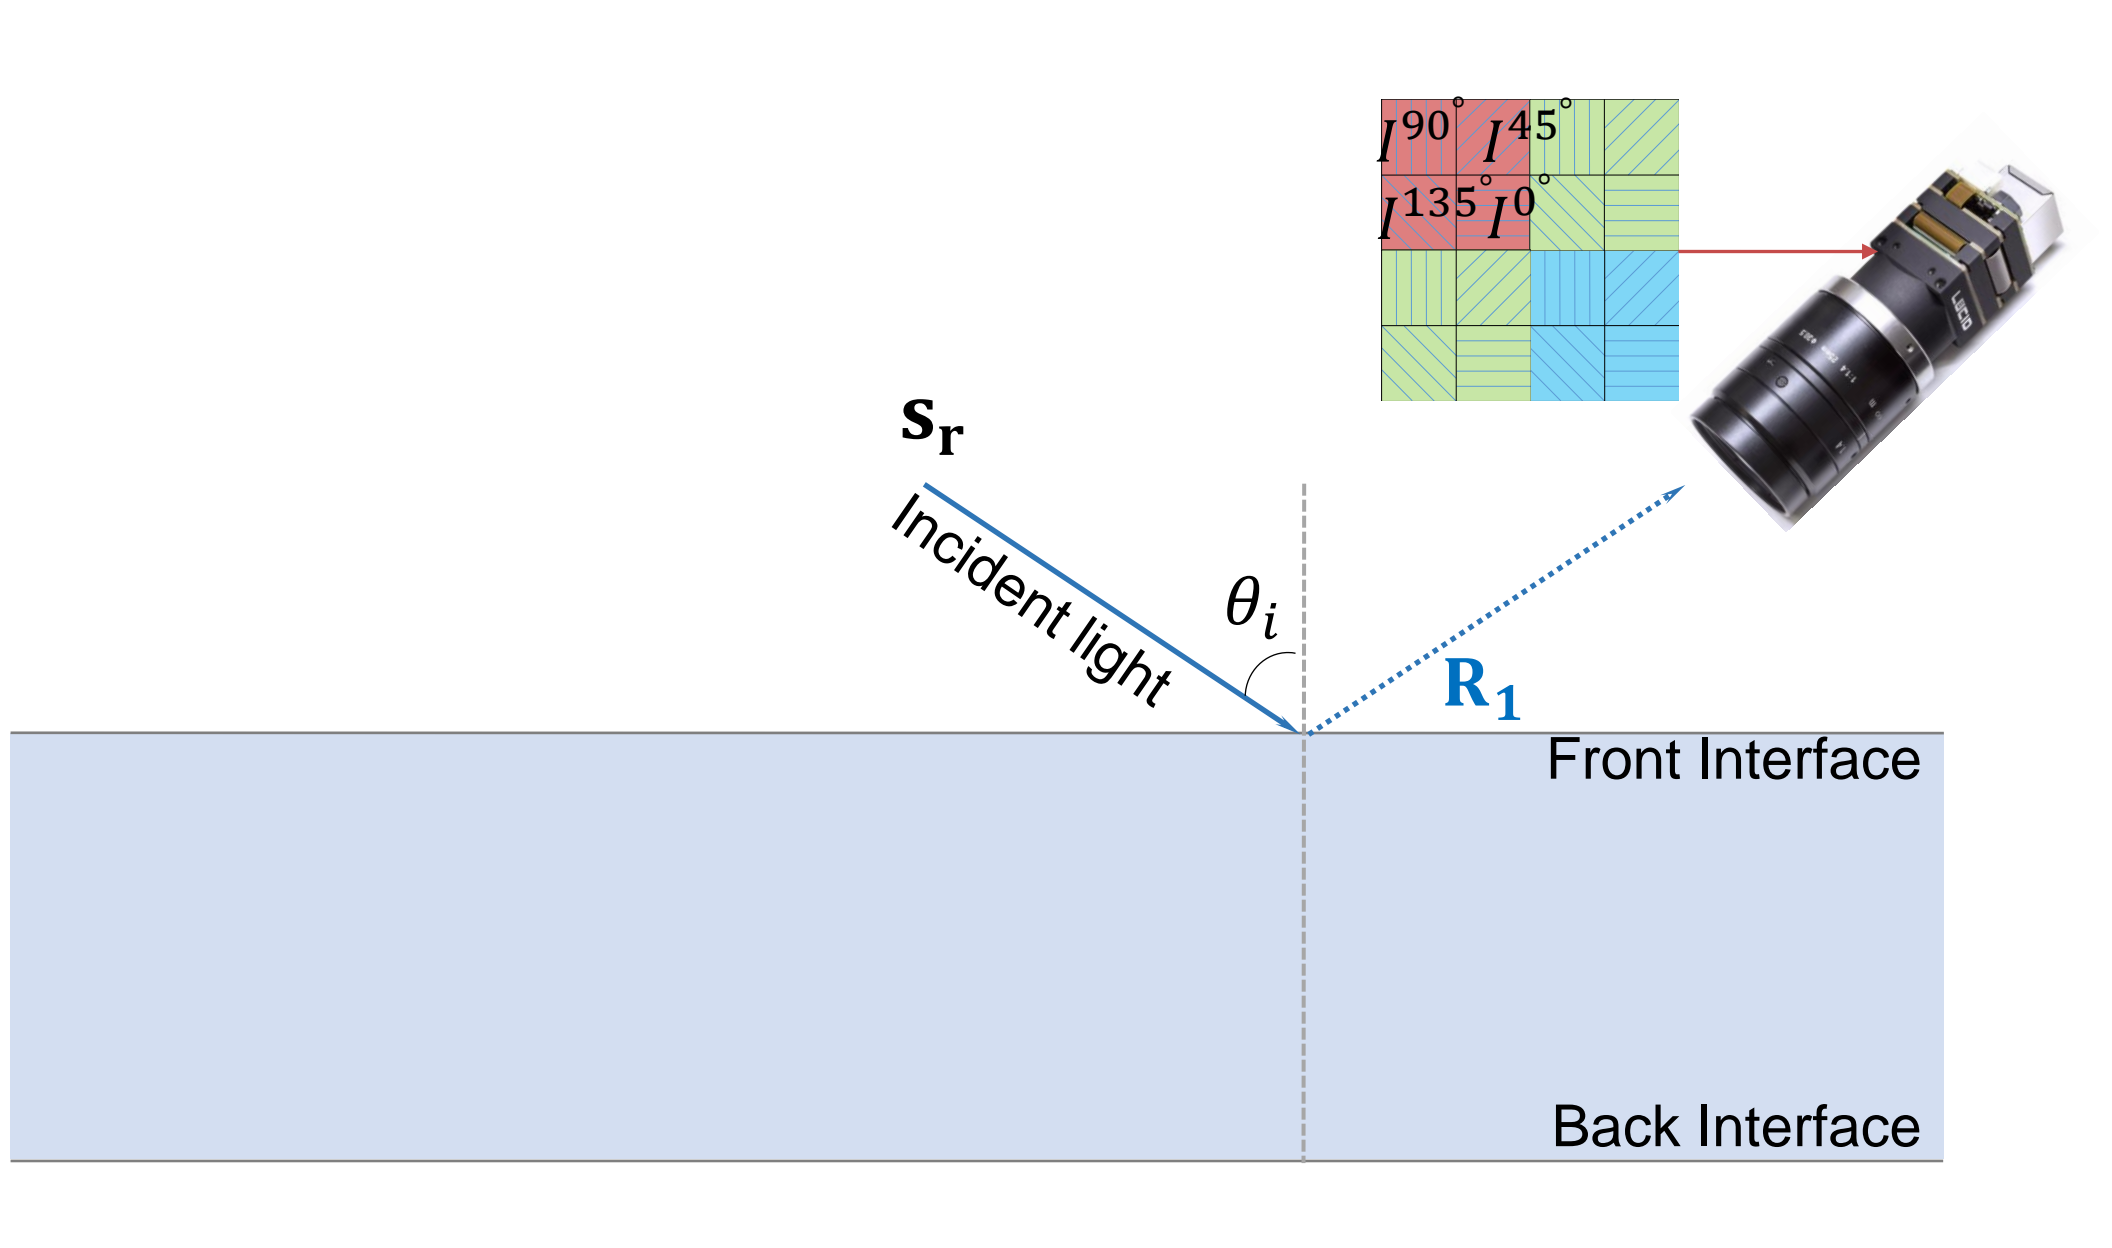

Supplement: Supplementary file 13 [file 123580766-supp.zip]

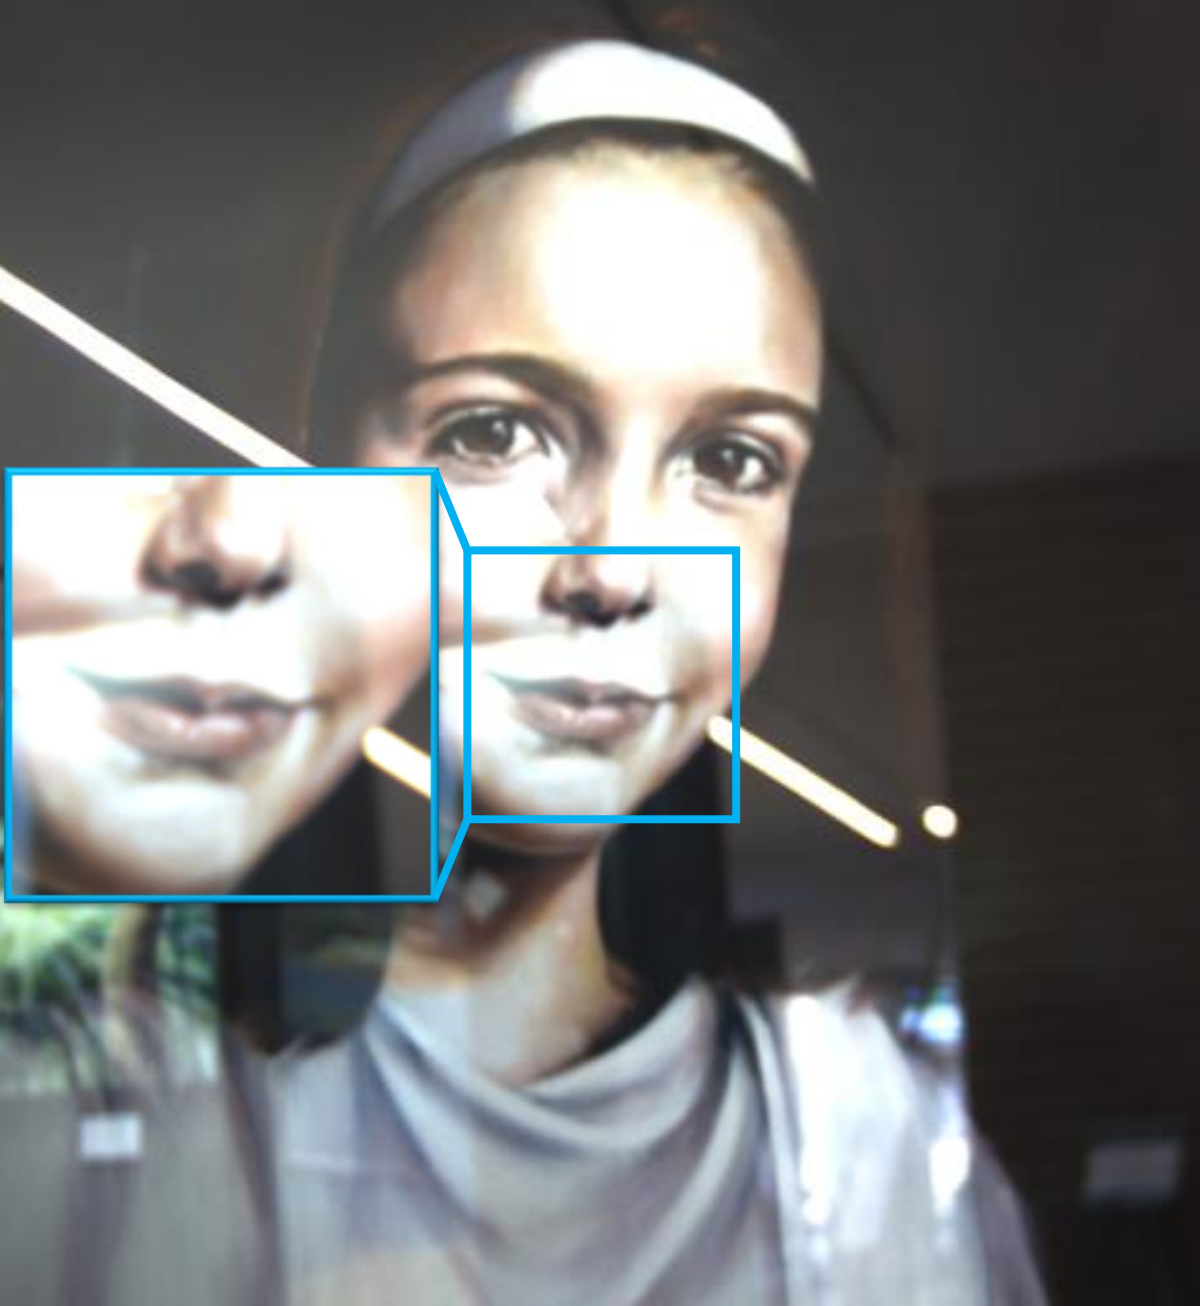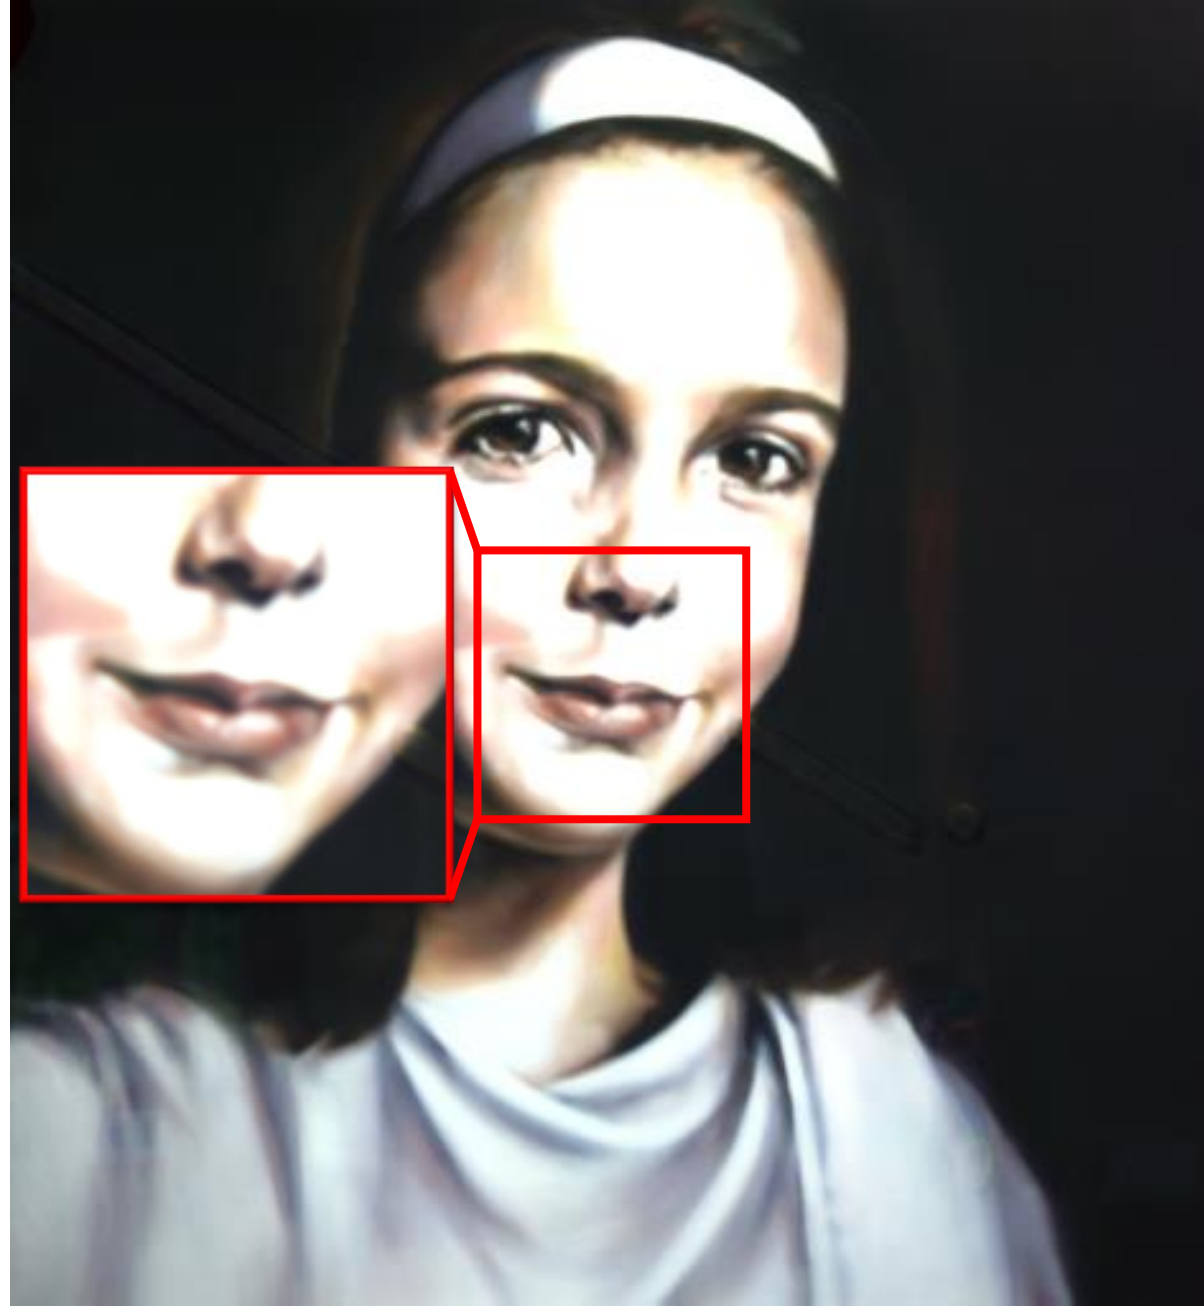

Supplement: Supplementary file 14 [file 123580766-supp.zip]

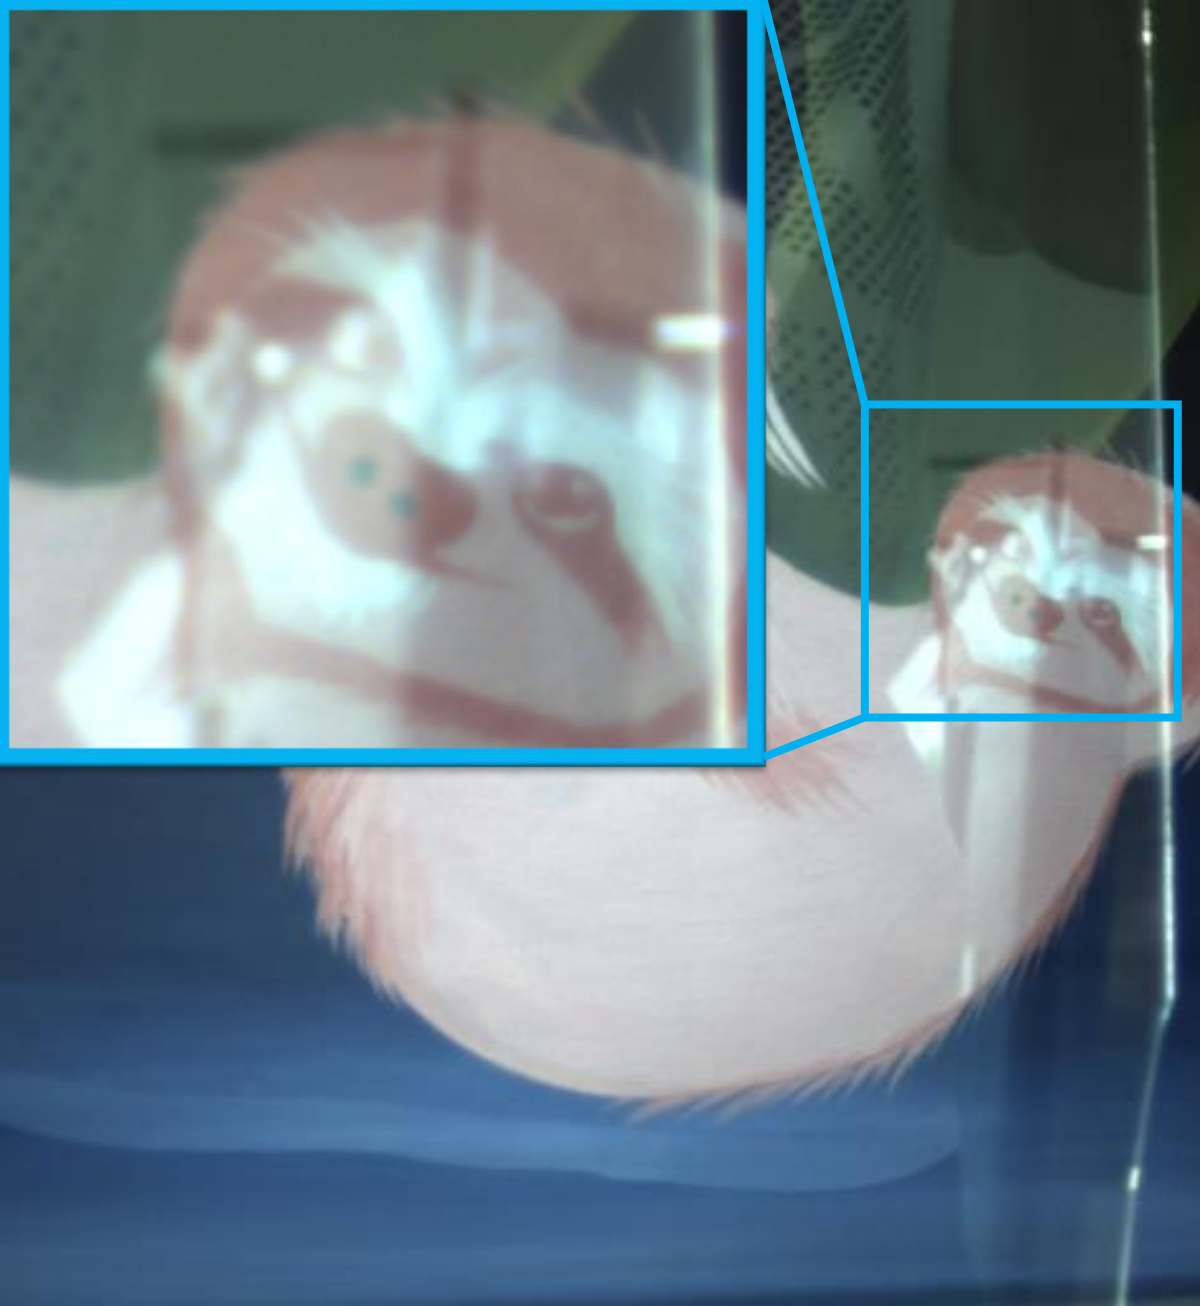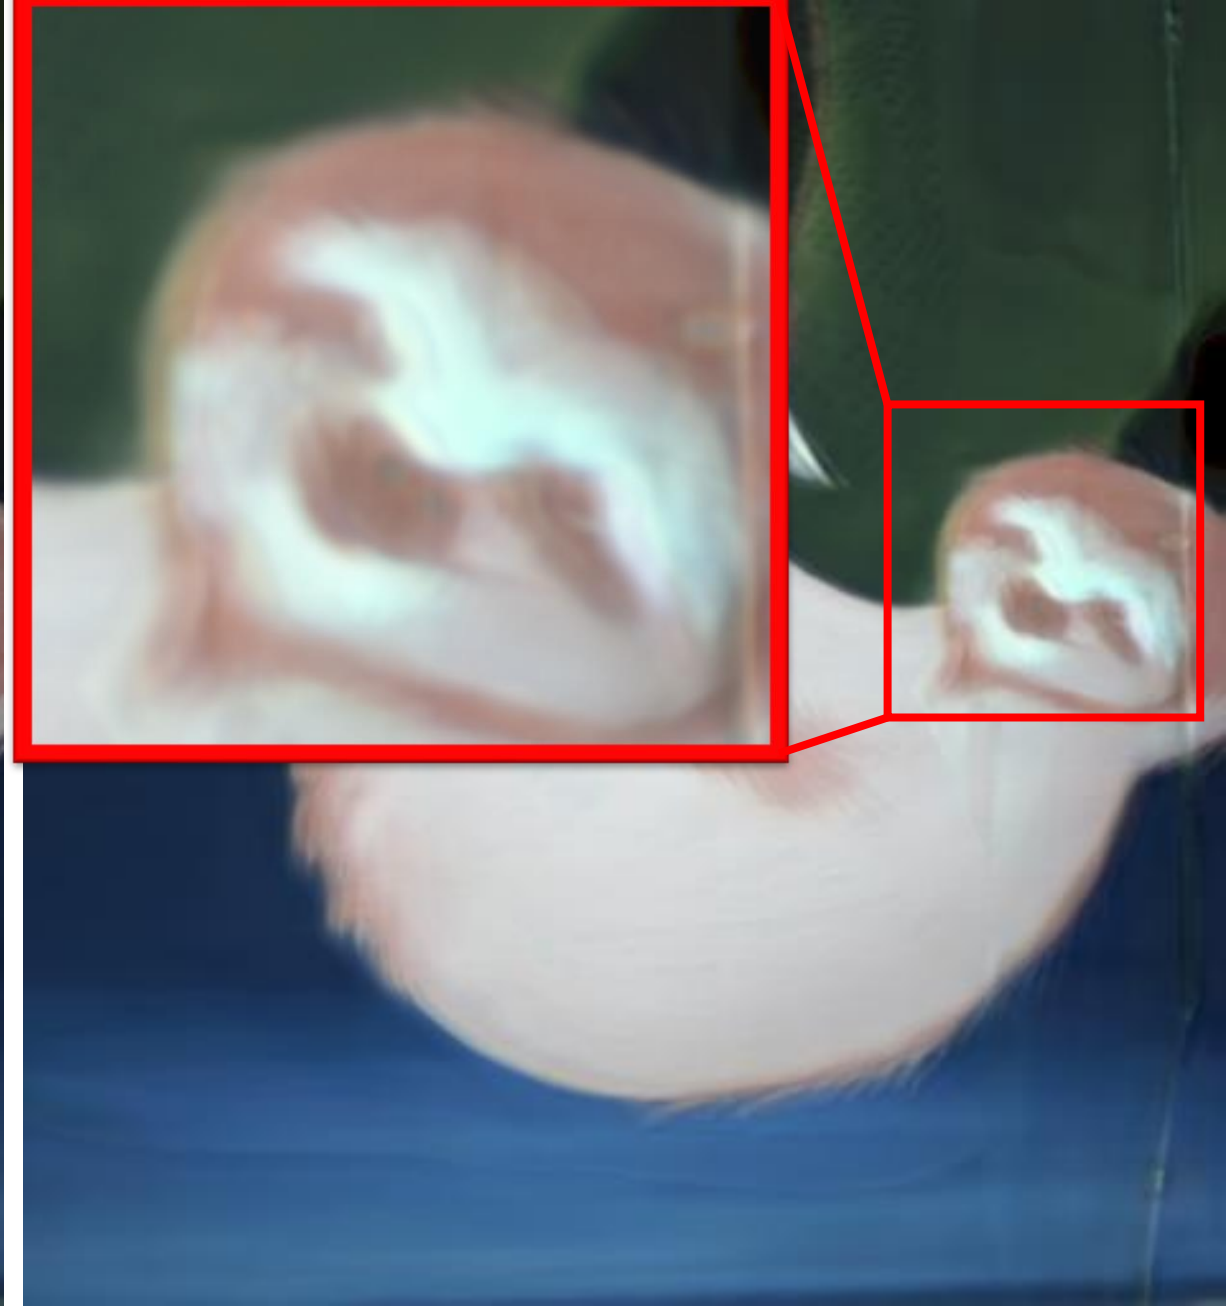

Supplement: Supplementary file 17 [file 123580766-supp.zip]

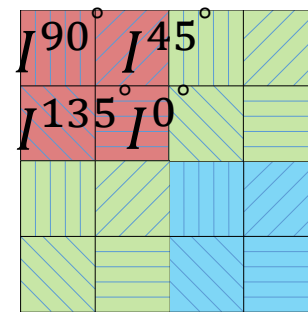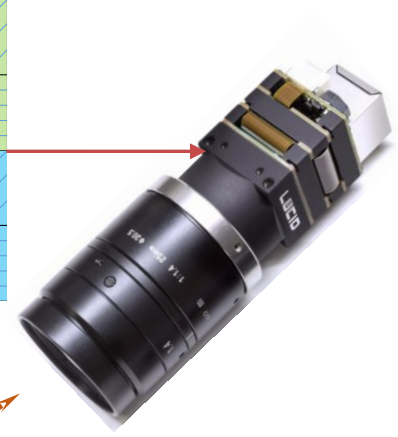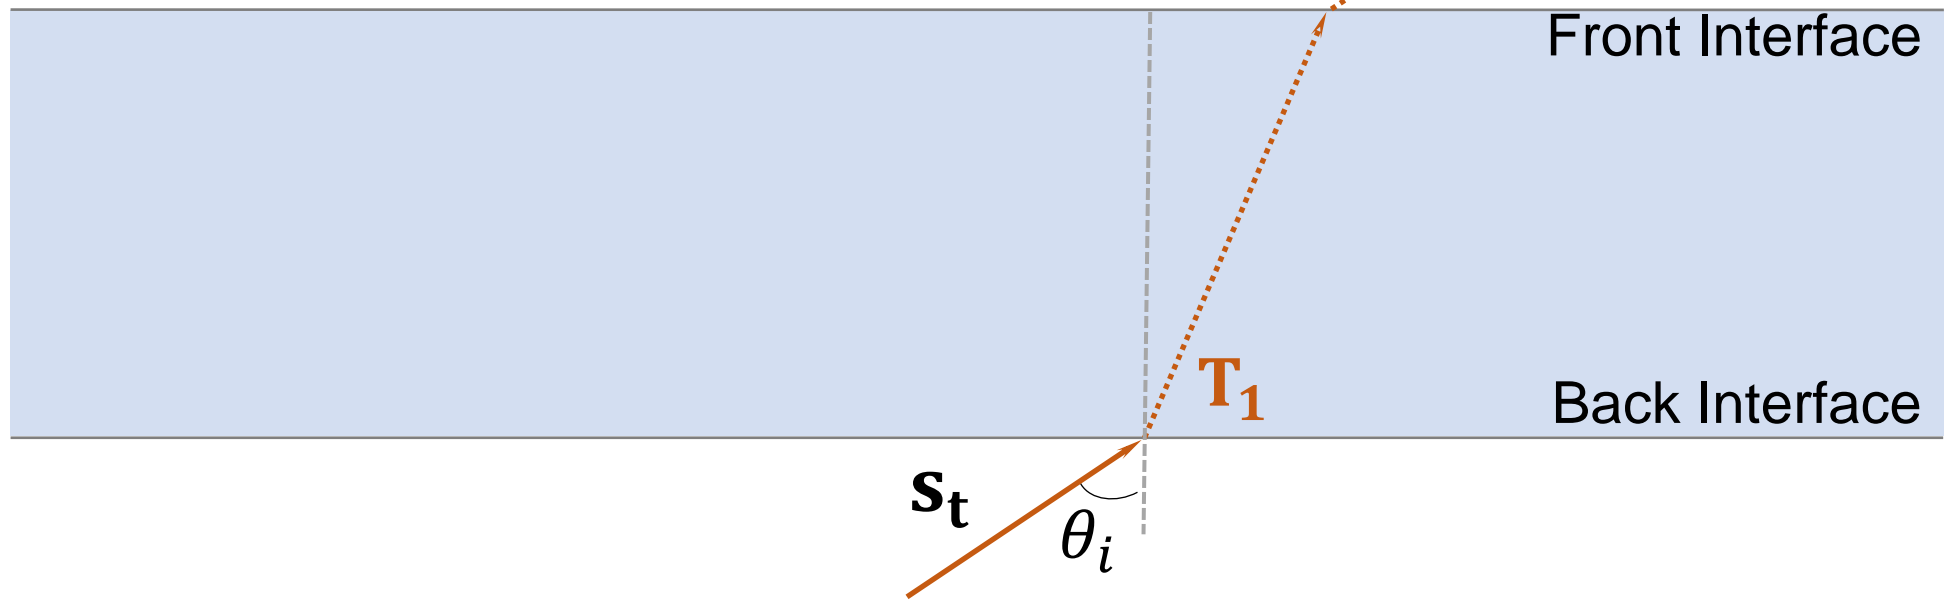

Supplement: Supplementary file 18 [file 123580766-supp.zip]

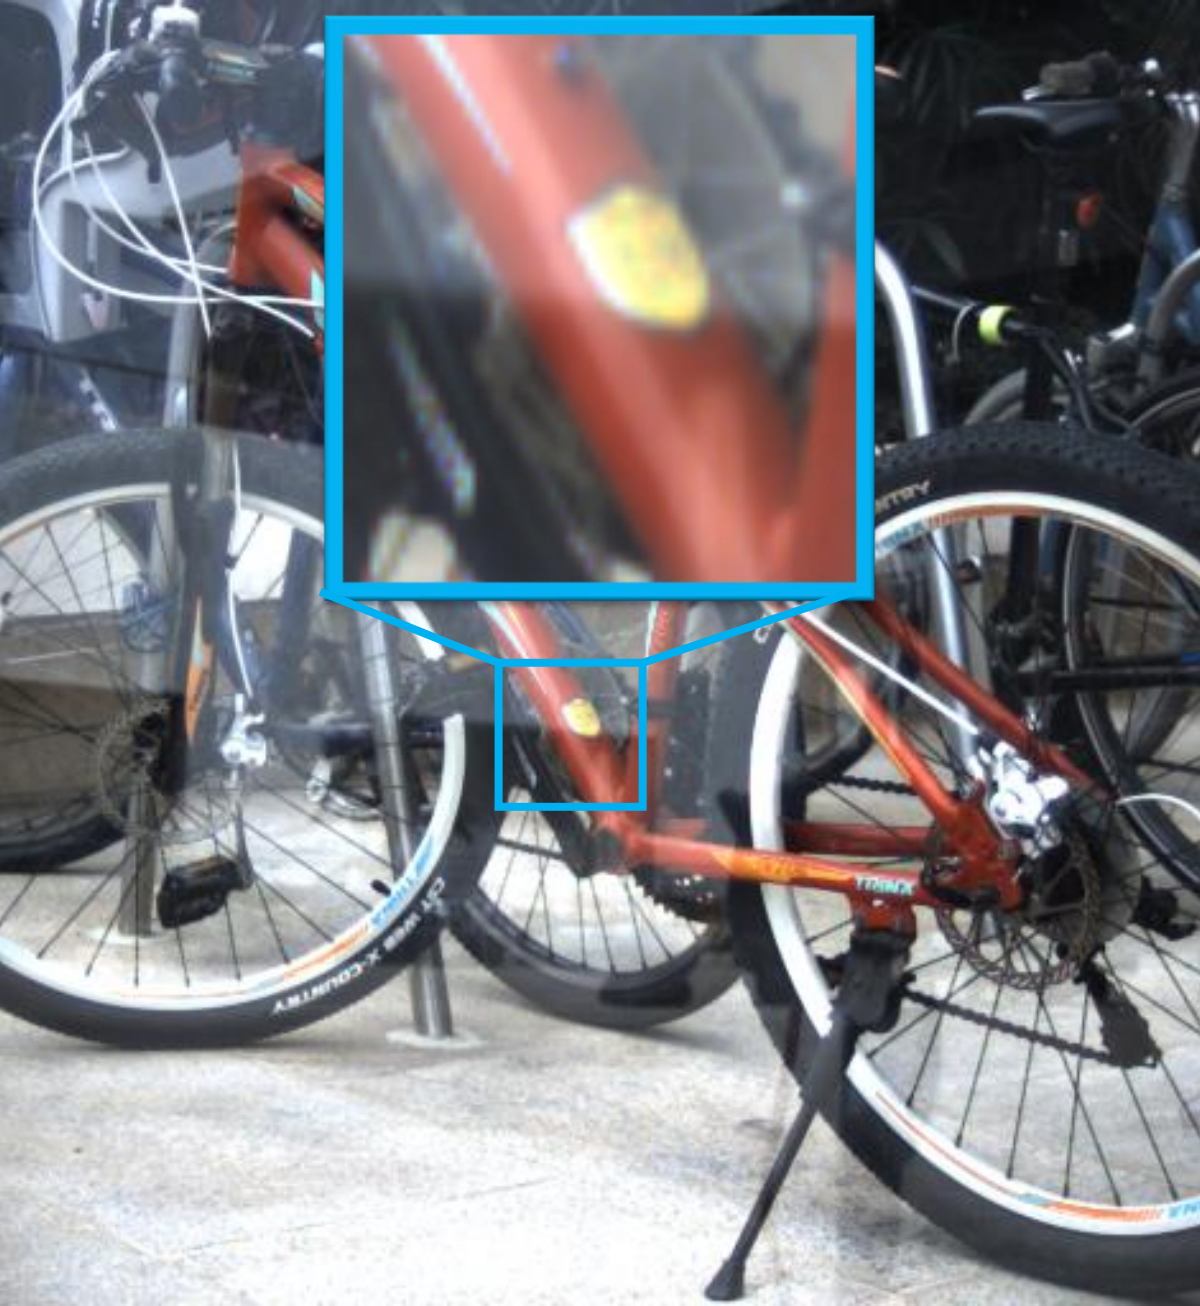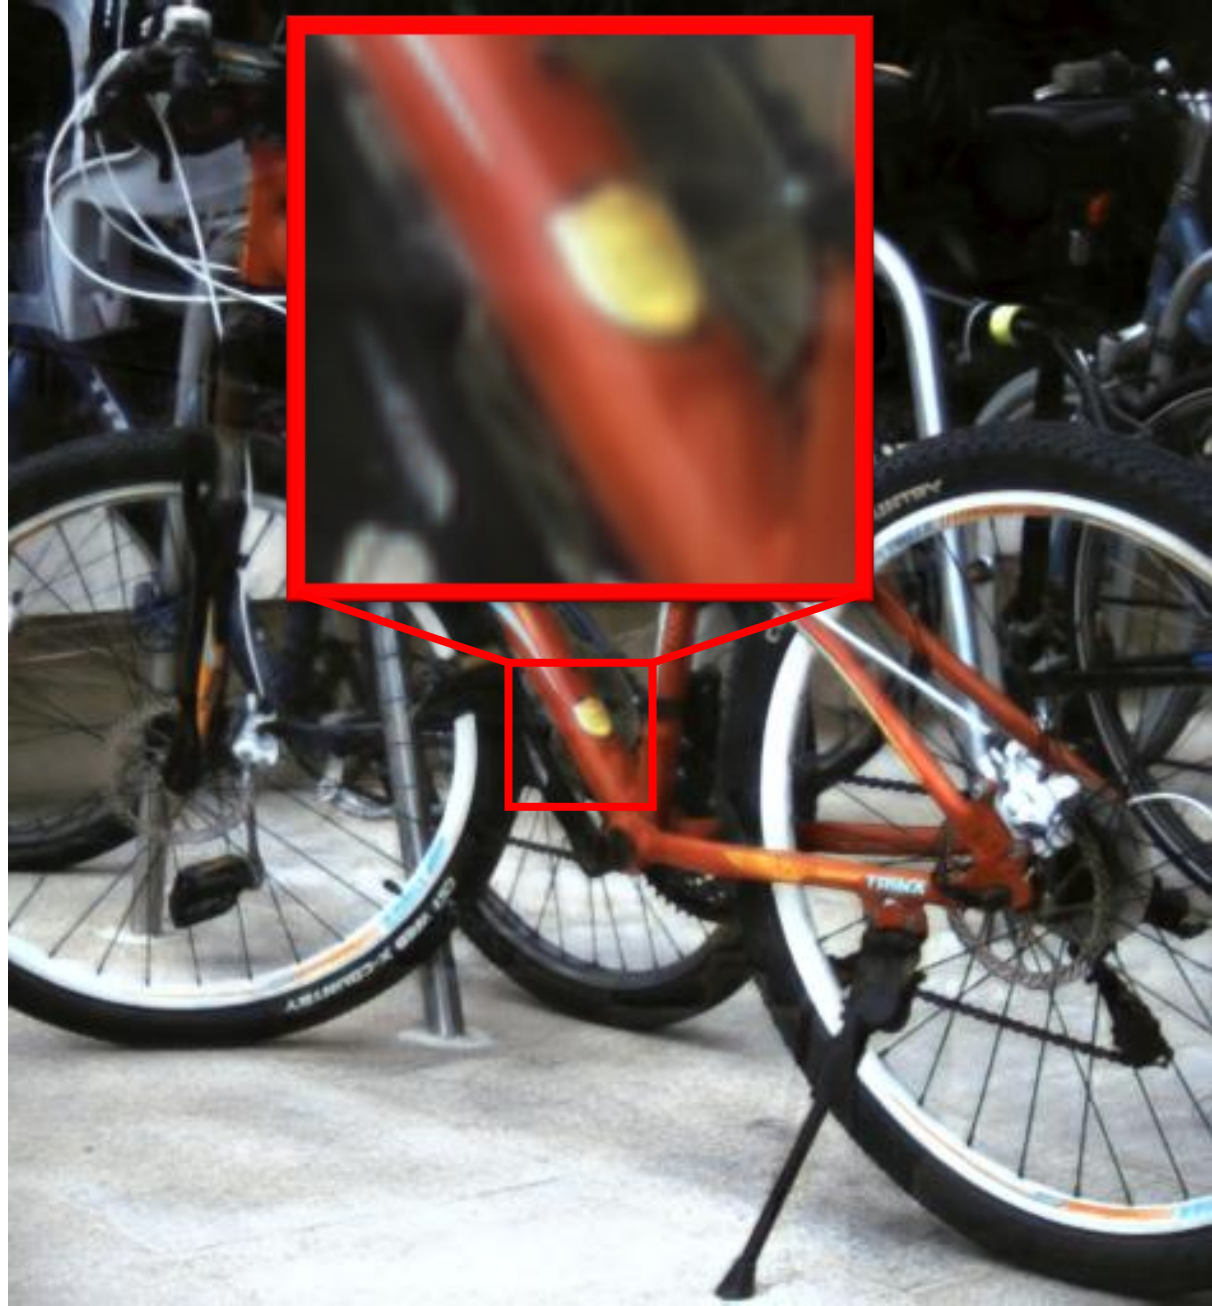

Supplement: Supplementary file 19 [file 123580766-supp.zip]

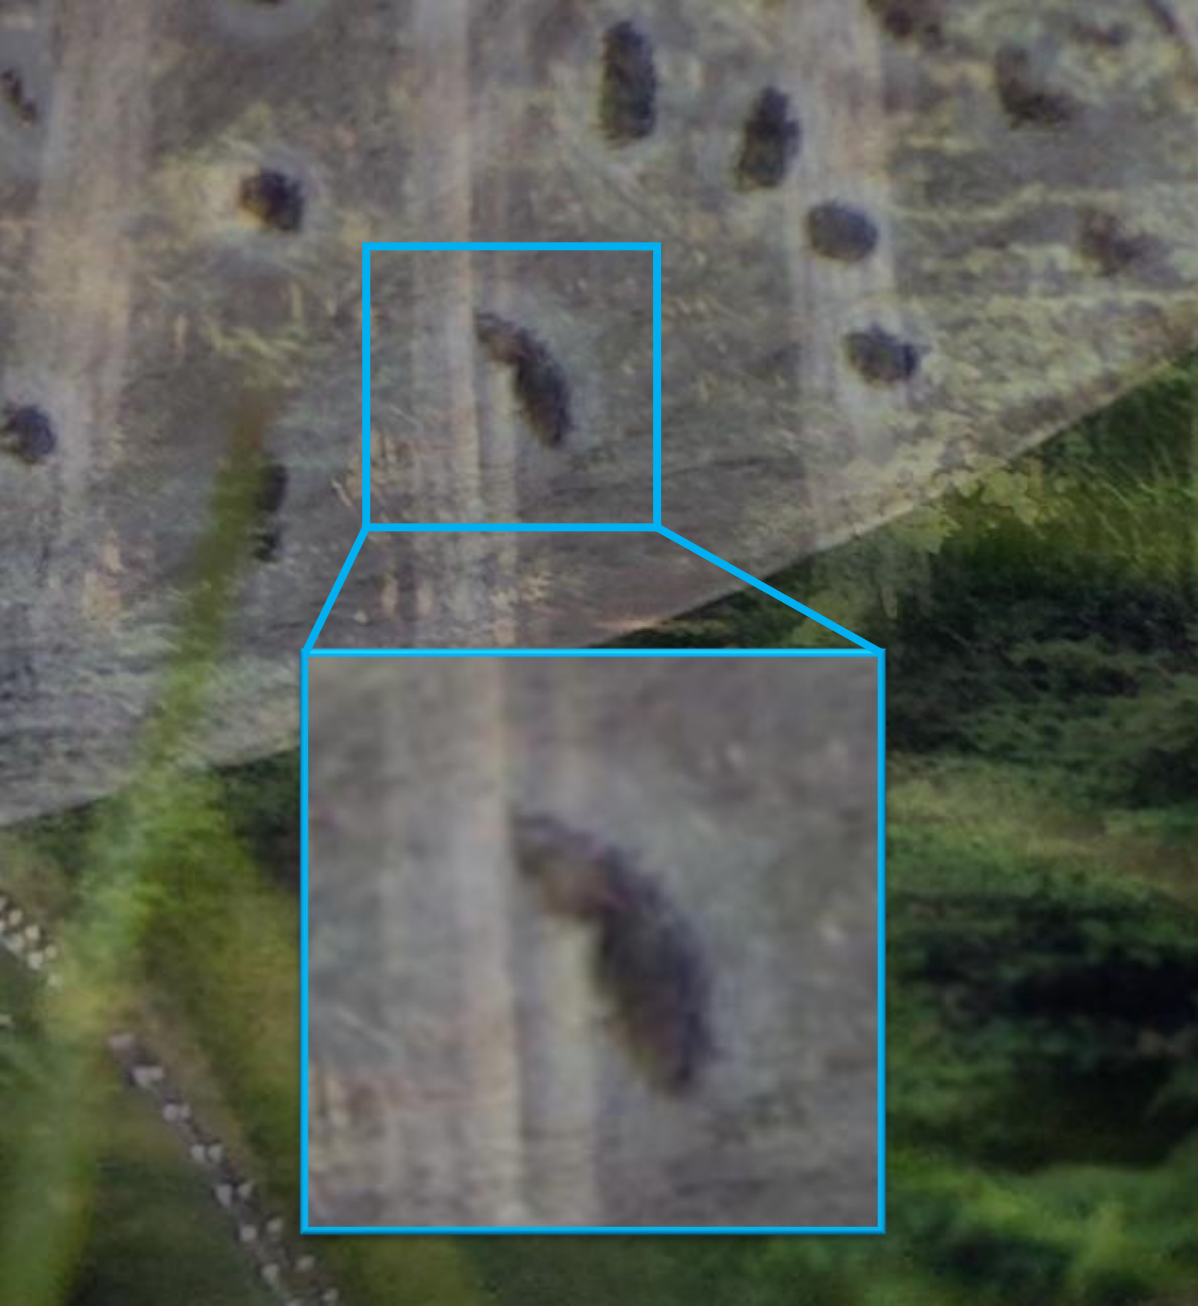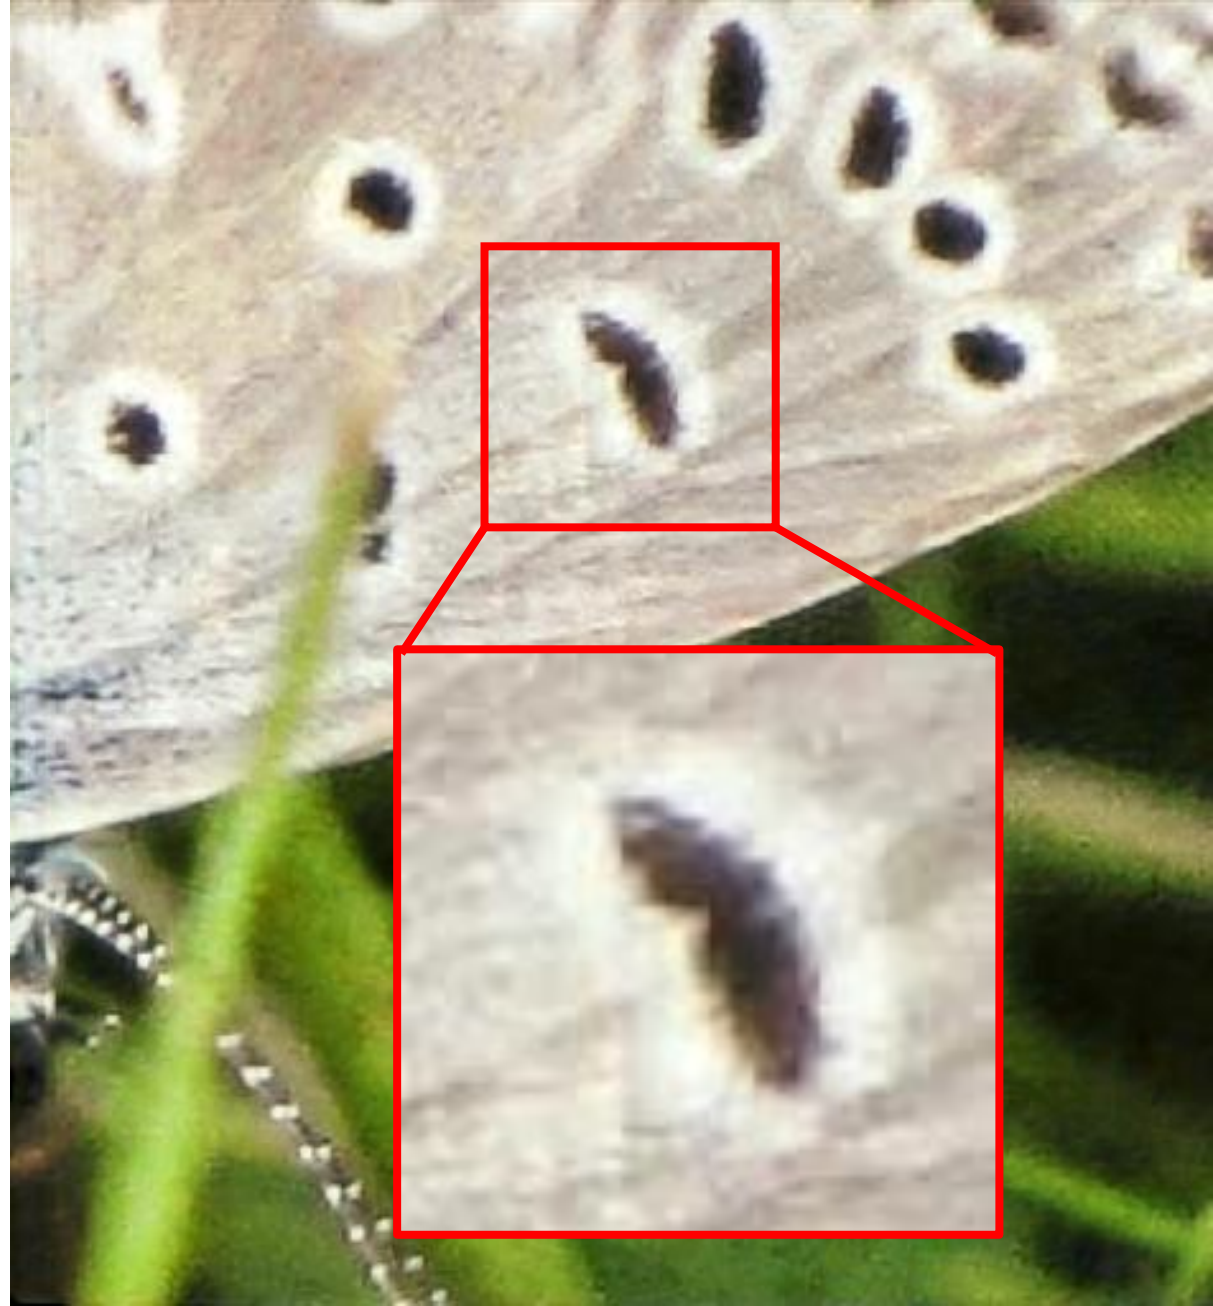

Supplement: Supplementary file 20 [file 123580766-supp.zip]

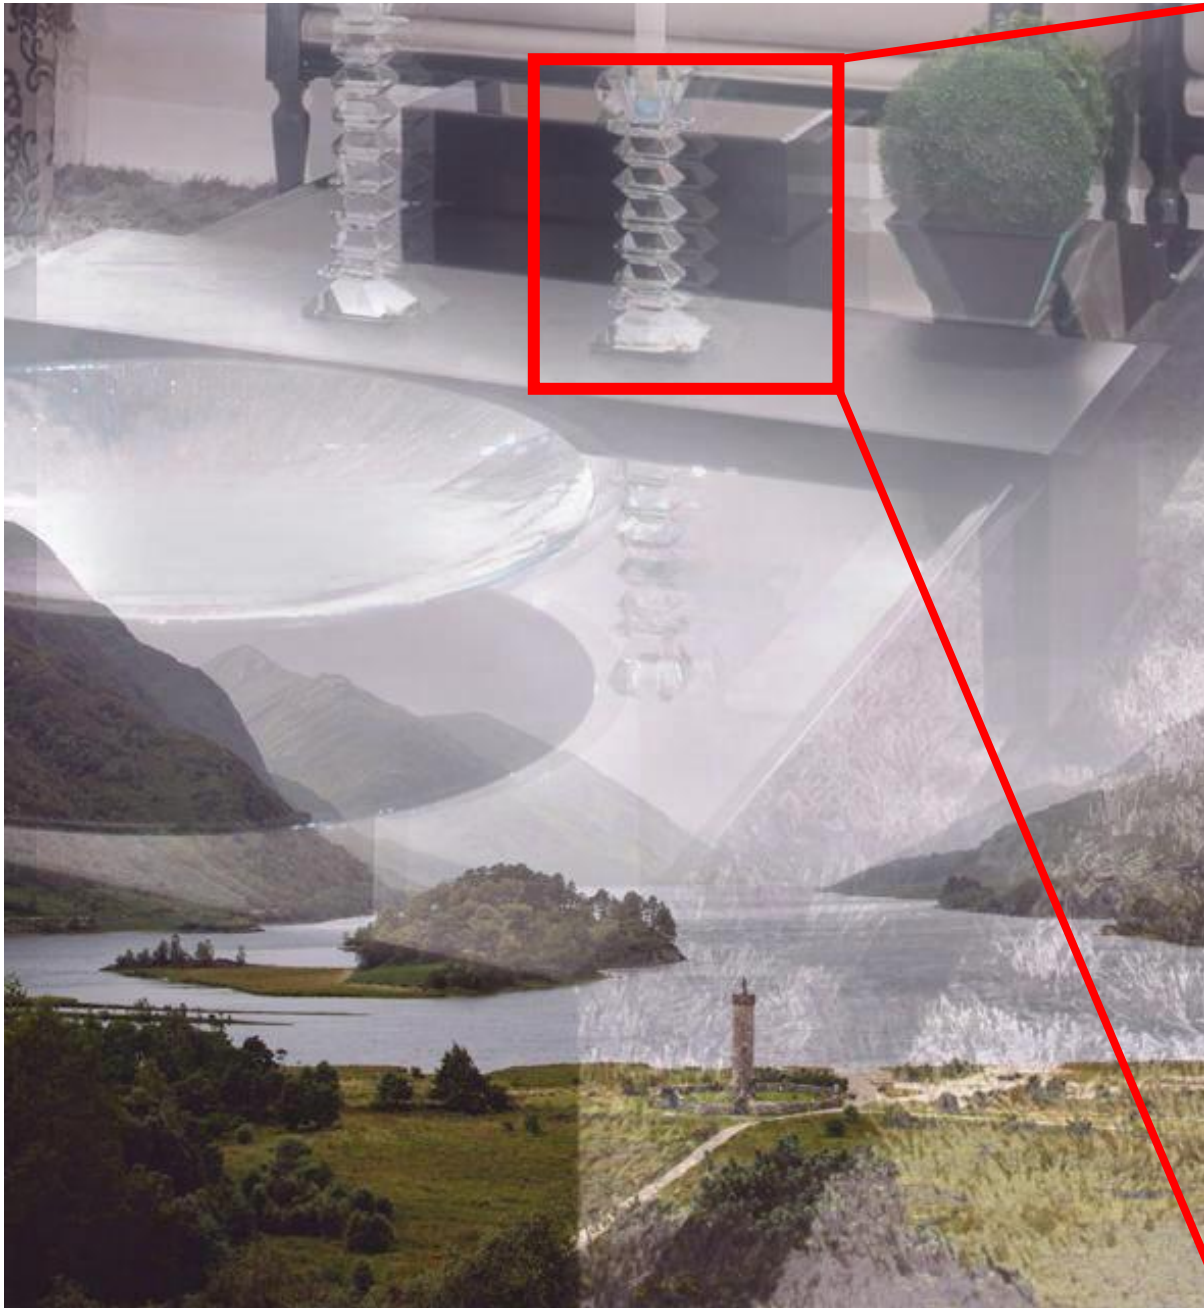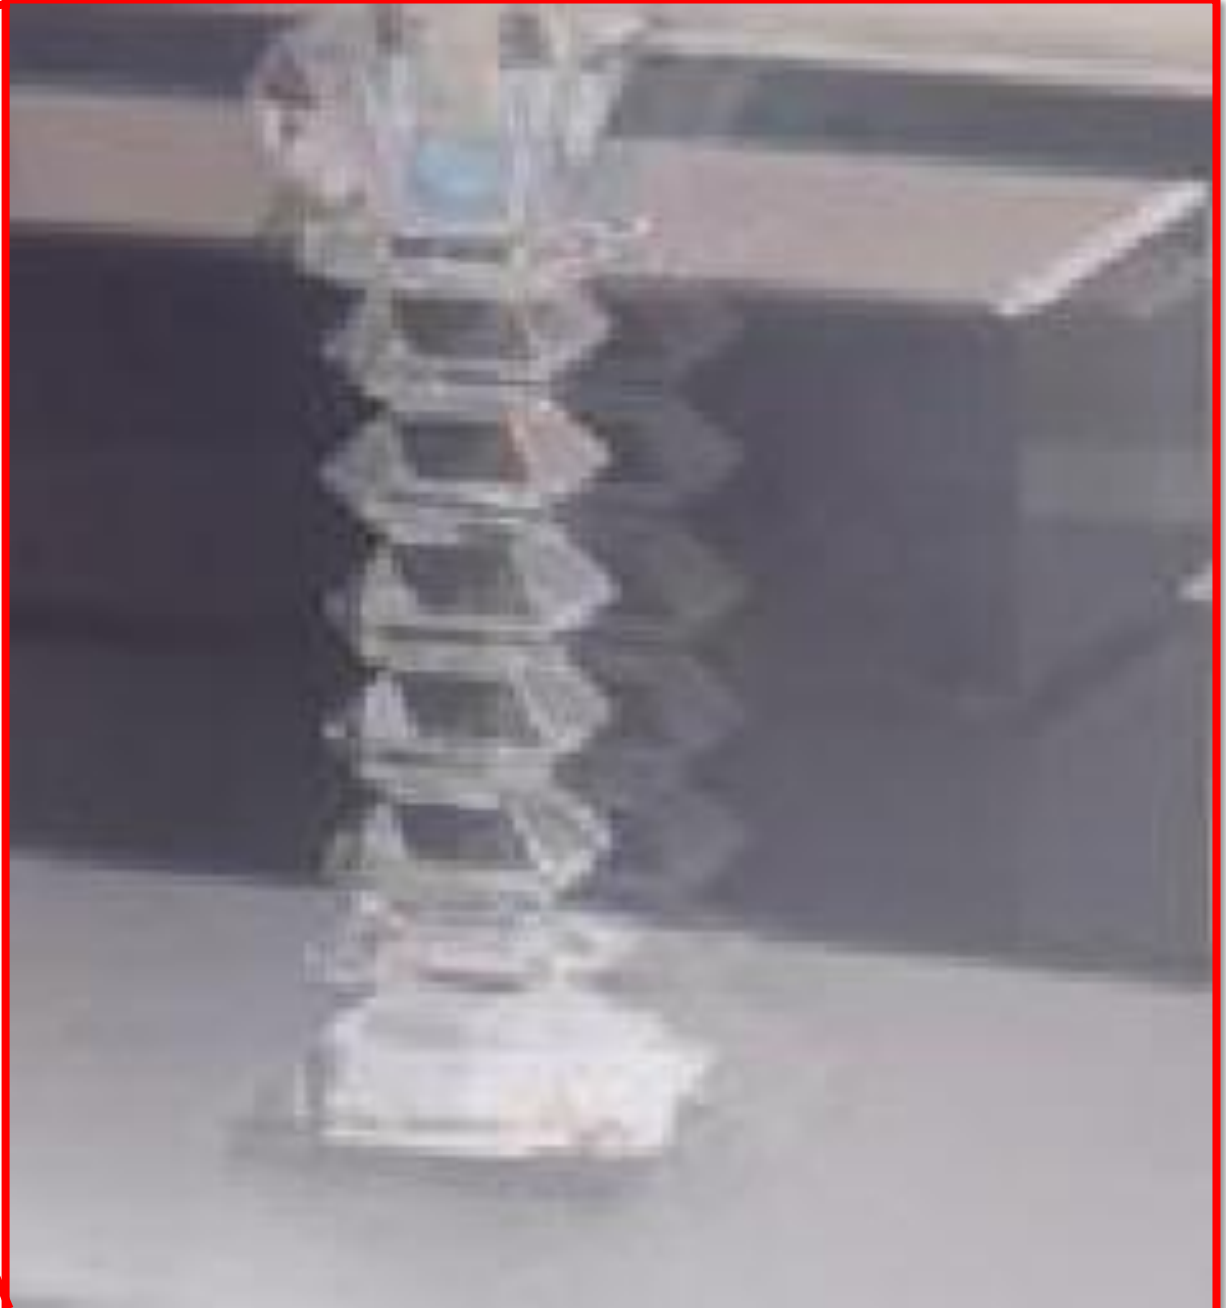

Supplement: Supplementary file 21 [file 123580766-supp.zip]

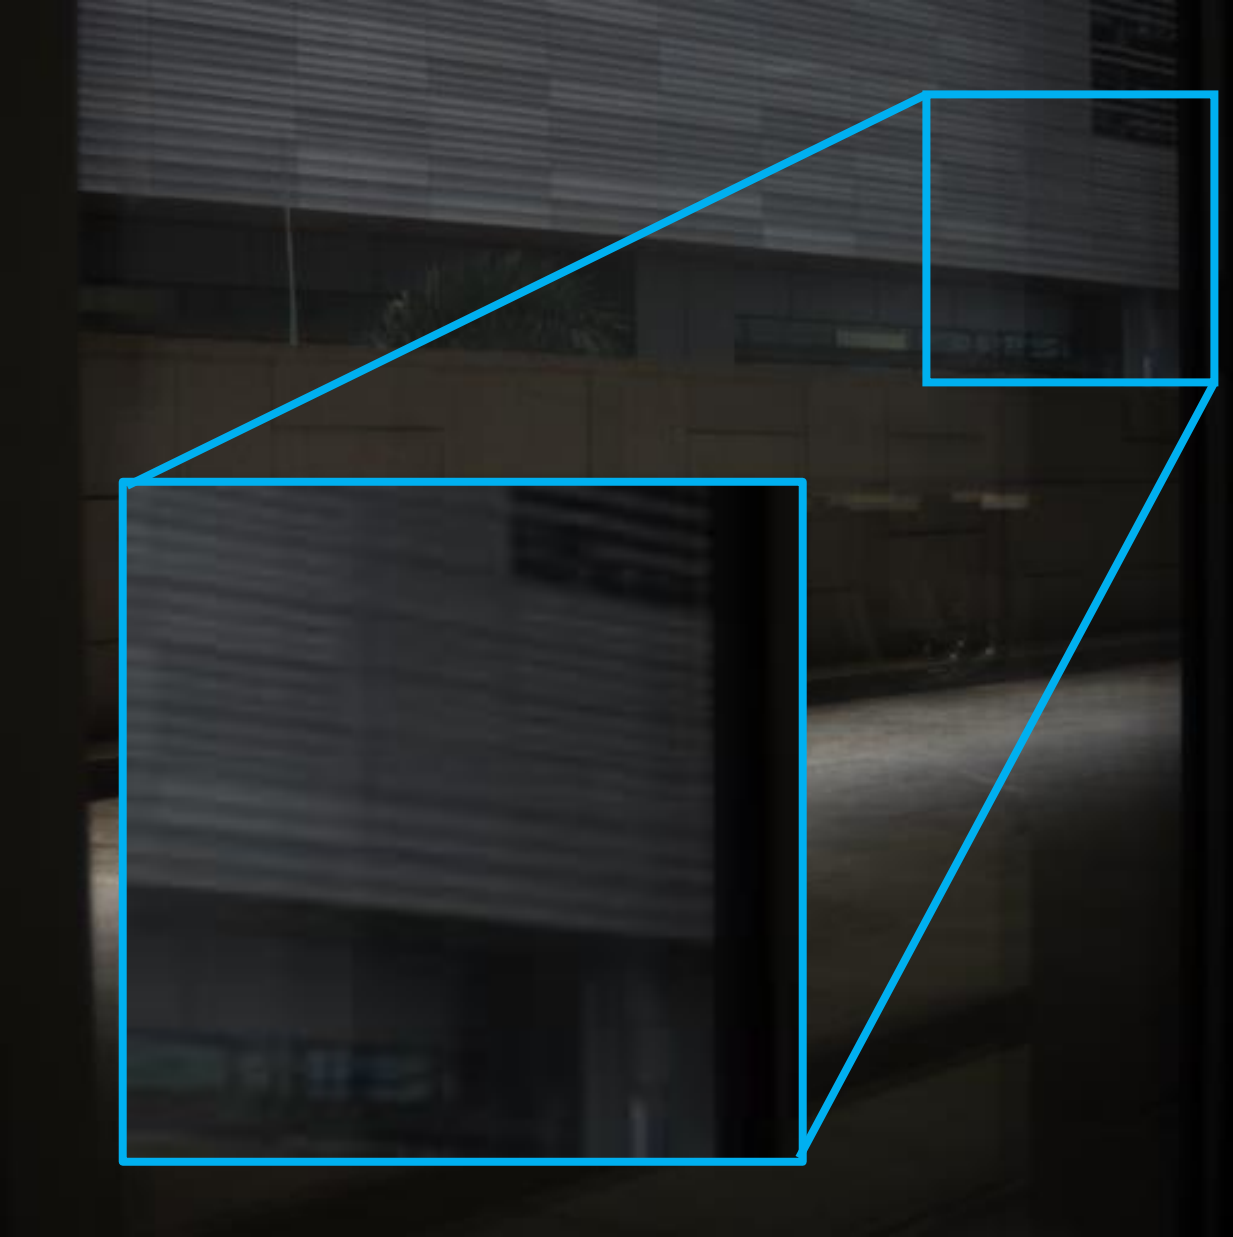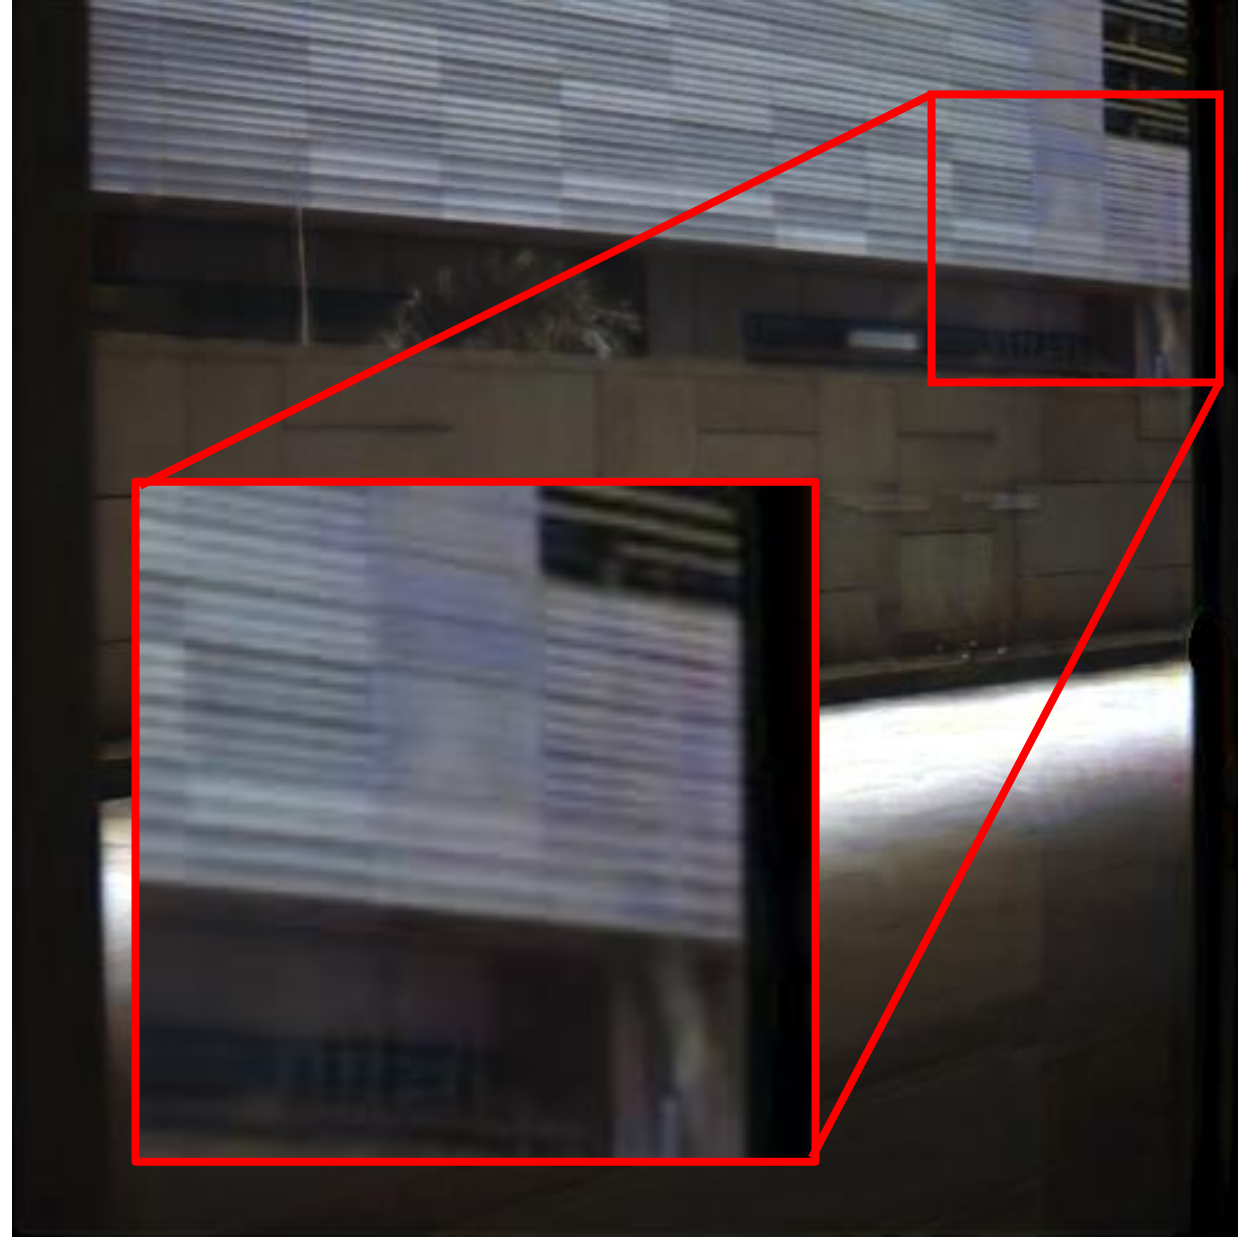

Supplement: Supplementary file 22 [file 123580766-supp.zip]
